## Bile acid composition regulates the manganese transporter Slc30a10 in intestine

Tiara R. Ahmad<sup>1,2</sup>, Sei Higuchi<sup>1,2</sup>, Enrico Bertaggia<sup>1,2</sup>, Allison Hung<sup>2</sup>, Niroshan Shanmugarajah<sup>1,2</sup>, Nicole C. Guilz<sup>2</sup>, Jennifer R. Gamarra<sup>2</sup>, and Rebecca A. Haeusler<sup>1,2\*</sup>

From <sup>1</sup>Department of Pathology and Cell Biology, Columbia University, New York NY 10032; <sup>2</sup>Naomi Berrie Diabetes Center, Columbia University, New York NY 10032

Running title: *Bile acids regulate manganese transport*

\*To whom correspondence should be addressed: Rebecca A. Haeusler: Naomi Berrie Diabetes Center, Columbia University 10032; [rah2130@columbia.edu](mailto:rah2130@columbia.edu); Tel. (212) 851-4899

**Keywords:** intestine, bile acids, manganese, organoid, metal transport

---

### ABSTRACT

Bile acids (BAs) comprise heterogenous amphipathic cholesterol-derived molecules that carry out physicochemical and signaling functions. A major site of BA action is the terminal ileum, where enterocytes actively reuptake BAs and express high levels of BA-sensitive nuclear receptors. BA pool size and composition are affected by changes in metabolic health, and vice versa. One of several factors that differentiate BAs is the presence of a hydroxyl group on C12 of the steroid ring. 12 $\alpha$ -hydroxylated BAs (12HBAs) are altered in multiple disease settings, but the consequences of 12HBA abundance are incompletely understood. We employed mouse primary ileum organoids to investigate the transcriptional effects of varying 12HBA abundance in BA pools. We identified *Slc30a10* as one of the top genes differentially induced by BA pools with varying 12HBA abundance. SLC30A10 is a manganese (Mn) efflux transporter critical for whole-body manganese excretion. We found that BA pools, especially those low in 12HBAs, induce cellular manganese efflux, and that *Slc30a10* induction by BA pools is driven primarily by lithocholic acid signaling via the vitamin D receptor. Administration of lithocholic acid or a vitamin D receptor agonist resulted in increased *Slc30a10* expression in mouse ileum epithelia. These data demonstrate a previously unknown role for BAs in intestinal control of Mn homeostasis.

Bile acids (BAs) are cholesterol catabolites that regulate many biological functions, including multiple aspects of macronutrient metabolism. One of the mechanisms by which they do so is by promoting lipid emulsification and absorption (1–3). A second mechanism is by acting as a ligand for BA receptors, which can regulate lipid and glucose metabolism (1–4). It is underappreciated that there is structural diversity among BAs that results in variable capacities to activate BA receptors (5–10). This structural diversity arises from the number and position of hydroxyl groups and the conjugation of the molecule to glycine, taurine, or neither (11, 12). Thus the composition of the BA pool may affect the activity of BA receptors. However, the biological consequences of altered BA pool composition are not fully known.

One key determinant of BA composition is the hepatic enzyme sterol 12 $\alpha$ -hydroxylase (encoded by *CYP8B1*). By adding a 12 $\alpha$ -hydroxylation to an intermediate of the BA synthesis pathway, *CYP8B1* determines the hepatic synthesis of cholic acid (CA) instead of chenodeoxycholic acid (CDCA) (Fig. 1A) (12, 13). In settings of insulin resistance, there is an increased proportion of CA, its bacterial metabolite deoxycholic acid (DCA), and their conjugates—collectively termed 12 $\alpha$ -hydroxylated BAs (12HBAs) in the BA pool (14, 15). Rates of 12HBA synthesis and CA conversion to DCA are also higher in insulin resistance and type-2 diabetes (16, 17). Moreover, even in healthy subjects, increases in 12HBAs are correlated with the characteristic metabolic abnormalities of insulin resistance (14). In contrast, *Cyp8b1*<sup>-/-</sup> mice, which

lack 12HBAs, are protected from western-type diet-induced weight gain and atherosclerosis compared to wild-type mice (18–20). *Cyp8b1*<sup>-/-</sup> mice also show improved glucose tolerance, which has been proposed to be due to increased secretion of glucagon-like peptide-1 (GLP-1) (21). Mice subjected to vertical sleeve gastrectomy (VSG), a common weight loss surgery, exhibit reduced *Cyp8b1* mRNA expression as well as lower ratios of 12HBAs:non-12HBAs in circulation (22). Furthermore, siRNA against *Cyp8b1* improved non-alcoholic steatohepatitis in mice (23). Thus, CYP8B1 inhibition is a potential therapeutic target for metabolic diseases. However, the biological processes that are regulated by 12HBAs are incompletely understood.

A major site of BA signaling is the intestine, which encounters high BA concentrations, approximately 2–12 mM after a meal (24, 25). The intestine epithelium expresses at least three BA receptors. The transcription factor FXR regulates BA transport and feedback suppression of hepatic BA synthesis, and also modulates lipid and glucose metabolism (1). The membrane receptor TGR5 regulates glucose homeostasis and colonic motility by promoting the secretion of GLP-1 and serotonin (26–28). Another intestinal receptor responsive to certain BAs is the vitamin D receptor (VDR), whose canonical role is to promote calcium and phosphate absorption (29). For each of these receptors, the best reported endogenous BA agonists are non-12HBAs. For FXR it is CDCA (5, 6, 9), for TGR5 and VDR it is lithocholic acid (LCA) (7, 8, 10). LCA is formed by 7 $\alpha$ -dehydroxylation of CDCA by bacterial enzymes in the gut. Thus BA composition is predicted to impact signaling through multiple receptors in the intestine.

Investigating the effects of BA composition on intestinal BA signaling *in vivo* is challenging because of the continued presence of endogenous BAs. This is particularly important for experiments in mice, as mice contain a class of BAs—muricholic acids (MCAs), which are non-12HBAs—that are not found in healthy adult humans. To fill the gap, we used primary murine intestinal organoids, also called enteroids. These organoids are generated from stem cells of the intestinal crypts, and contain all known cell types of the intestinal epithelium

(30). We investigated the effects of BA pools of different compositions on ileal organoids, with a particular focus on the effects of lowering 12HBAs (to mimic CYP8B1 inhibition). Furthermore, we addressed the interspecies differences in BAs by using BA pools that we designed to mimic the effects of CYP8B1 inhibition in humans and mice.

We unexpectedly found that varying 12HBA proportions modulates expression of *Slc30a10*, a manganese (Mn) efflux transporter critical for whole-body Mn excretion. Cellular Mn levels are tightly regulated, as Mn is essential for numerous cellular processes, yet its excess is toxic (31). Our data demonstrate a previously unknown role of BAs in intestinal control of metal homeostasis.

## Results

### ***Distinct BA pool compositions differentially induce gene expression***

To test the effects of a low 12HBA pool on intestinal gene expression, we designed four distinct BA pools with which to stimulate primary murine ileal organoids. The differences between the pools were due to two key features: (i) the proportion of 12HBAs, either 10% (low) or 90% (high), and (ii) the BA pool of the species we model, either human or mouse (Table 1, Fig. 1B). In the human pools, there was a larger proportion of DCA and the BAs were glycine-conjugated, whereas in the mouse pools, BAs were taurine-conjugated, to mimic the natural abundance in those species (4, 32, 33). Mouse BA pools contained MCAs, whereas these were not included in the human pools. Thus, the four BA pools are labeled human low 12HBA (H10), human high 12HBA (H90), mouse low 12HBA (M10), and mouse high 12HBA (M90). Importantly, the total BA pool concentration was the same across all treatment groups. We prepared the four BA pools in mixed micelles containing oleic acid, 2-palmitoyl glycerol, phosphatidylcholine, and free cholesterol, to mimic conditions of the intestinal lumen. We used the four lipid-emulsified BA pools to treat primary murine ileal organoids. The vehicle control contained all micelle components except BAs. We performed bulk RNA sequencing after 24 hours of treatment.

We focused on the effects of the low 12HBA pools, as this would mimic the effects of CYP8B1

inhibition. We examined all genes that were significantly induced compared to vehicle, setting thresholds of  $\log_2FC > 1.0$  and  $p_{adj} < 0.05$  for differential expression. The low 12HBA pools collectively induced 1361 genes. Of these, 516 reached those thresholds for both H10 and M10 pools, 95 reached those thresholds for H10 only, and 750 for M10 only (Supp. Fig. 1A). Pathway analysis indicates enrichment of genes involved in lipid metabolism, consistent with known effects of BAs (Table 2).

Next, we focused on the subset of these genes that are differentially regulated by low- versus high-12HBA pools, with a particular focus on those for which the effects were shared between human and mouse pools. We used a threshold of  $\log_2FC > 1.0$  and  $P_{adj} < 0.05$  for differential expression. The majority of genes did not reach this threshold, indicating that they are similarly regulated by both low- and high-12HBA pools, or are differentially regulated by low- versus high-12HBAs in human pools only or in mouse pools only (Supp. Fig. 1B). These genes included canonical FXR targets such as *Fgf15*, *Fabp6* (encoding the ileal bile acid binding protein, Ibabp), and *Slc51b* (encoding the basolateral BA efflux transporter Ost $\beta$ ), and we validated these by qPCR (Fig. 1C).

There were 44 genes that were preferentially induced by H10 and M10 compared to H90 and M90, respectively (Fig. 1D). Among these, we noted that several are known transcriptional targets of VDR. These included *Cyp24a1*, *S100g*, and *Cyp3a11*, and we validated these by qPCR (Fig. 1E). This is consistent with the concepts that (i) certain BAs, especially the non-12HBA lithocholic acid (LCA) and its conjugates, can activate VDR in the  $\mu\text{M}$  range (10), and (ii) the low 12HBA pools (*i.e.* H10 and M10) contain more LCA (9  $\mu\text{M}$ , as opposed to 1  $\mu\text{M}$  in the high 12HBA pools).

Next, we validated the RNA-seq findings in multiple experimental systems. Using organoids derived from multiple mice, we confirmed that all BA pools induced expression of FXR targets *Fgf15* and *Fabp6* (Supp. Fig. 1C). We also confirmed that VDR targets *Cyp24a1* and *S100g* were preferentially induced by low 12HBA pools (Supp. Fig. 1D). We found that delivery in micelles was not required, and that BAs *per se* were sufficient to

induce *Fgf15*, *Fabp6*, and *S100g* (Supp. Fig. 1E). Lastly, to determine whether differential response to BA pools also occur in human cells, we performed experiments in Caco-2 cells, which are enterocyte-like cells derived from a human epithelial colorectal tumor. We observed that FXR and VDR targets were robustly induced by H10, but not H90 (Supp. Fig. 1F, 1G).

### ***BA composition regulates Slc30a10 transcription and cellular Mn efflux***

Among the genes identified to be differentially expressed between BA pools with varying 12HBA abundance, one of the most robust was *Slc30a10* (Fig. 1D). This gene encodes a Mn efflux transporter critical for whole-body Mn excretion (34–41). Humans with mutations in *SLC30A10* develop hypermanganesemia, accompanied by parkinsonism and cirrhosis (34, 35, 42–44).

In gut organoids, low 12HBA pools were superior to high 12HBA pools in inducing *Slc30a10* (Fig. 2A, 2B). This preferential induction was consistent across multiple independent batches of organoids (Fig. 2C, 2D). This differential expression of *Slc30a10* was also observed when BA pools were delivered without micelles (Fig. 2E), indicating a direct effect of BAs. We also validated that the H10 pool induces *SLC30A10* in human Caco-2 cells (Fig. 2F).

Next we sought to determine whether BA-induced changes in *Slc30a10* transcript levels yield functional cellular consequences. We predicted that the induction of *Slc30a10* expression by low 12HBA pools would increase Mn efflux from organoids. To test this, we carried out Mn efflux assays, where we preloaded cells with Mn, washed away unabsorbed Mn, then treated the cells with vehicle or BA pools, and measured Mn levels in efflux media. Organoids treated with H10 had higher Mn in their efflux media compared to organoids treated with vehicle or H90 (Fig. 2G). Consistently, Caco-2 cells receiving H10 also showed higher Mn efflux compared to vehicle- and H90-treated cells (Fig. 2H). Altogether, these data show that BAs, particularly pools low in 12HBAs, induce cellular Mn efflux, consistent with their induction of *Slc30a10*.

### ***Slc30a10* transcription is driven by LCA-to-VDR signaling**

Recently, *SLC30A10* mRNA expression was found to be induced by the VDR agonist 1 $\alpha$ ,25-dihydroxyvitamin D<sub>3</sub> in Caco-2 cells (45). LCA is a potent VDR ligand, with an EC<sub>50</sub> comparable to CDCA's EC<sub>50</sub> for human FXR (10). Although LCA made up less than 1% of the BA pools in our studies, the LCA concentration in the low 12HBA pools was 9  $\mu$ M. As a point of reference, in duodenum of healthy adult humans, the total bile acid concentration is 20 mM, and LCA makes up 1-3% of the pool, ~200-600  $\mu$ M (25, 46, 47). Although LCA is partly sulfated and excreted, a portion is taken up into enterocytes (48, 49). Thus, we investigated whether the differential *Slc30a10* induction by low 12HBA pools was due to LCA-to-VDR signaling.

To test whether LCA is the differentiating factor between H10 and H90 in their induction of *Slc30a10*, we treated ileal organoids with H10 and H90 pools lacking LCA (Supp. Table 1). In pools lacking LCA, we compensated its removal by increasing other non-12HBAs such that the total BA pool concentrations matched. Without LCA, H10 induction of *Slc30a10* was significantly blunted (Fig. 3A). This pattern was similar to that of VDR targets *Cyp24a1* and *S100g* (Fig. 3B). On the other hand, presence or absence of LCA had no effect on FXR targets *Fgf15* and *Fabp6*, consistent with the observation that LCA is not a potent FXR agonist (Fig. 3C).

To test whether CDCA contributes to differential *Slc30a10* induction between low and high 12HBA pools, we treated gut organoids with M10 and M90 pools containing or lacking T-CDCA (Supp. Table 2). In pools lacking T-CDCA, we compensated its removal by increasing other non-12HBAs such that the total BA pool concentrations matched. Removing T-CDCA had no significant effect on *Slc30a10* mRNA levels (Fig. 3D), suggesting CDCA is dispensable for *Slc30a10* induction. Similarly, there was no effect of removing T-CDCA on *Cyp24a1* or *S100g* expression (Fig. 3E). CDCA and its conjugates are potent agonists of FXR (5, 6, 9). Consistent with this, removing T-CDCA from M10 and M90 pools resulted in blunted *Fgf15* and *Fabp6* induction (Fig. 3F). Together, these findings indicate that LCA, but not

CDCA, is the BA primarily responsible for the differential expression of *Slc30a10* between low-versus high- 12HBA pools.

To directly test the requirement of VDR for BA-induced *Slc30a10* transcription, we carried out experiments on gut organoids derived from *VDR*<sup>+/+</sup>, *VDR*<sup>+/-</sup>, and *VDR*<sup>-/-</sup> littermate mice. Strikingly, *VDR*<sup>-/-</sup> gut organoids showed substantially blunted *Slc30a10* transcription in response to H10 pool (Fig. 3G). Furthermore, *VDR*<sup>+/-</sup> gut organoids increased *Slc30a10* transcription to intermediate levels between that in *VDR*<sup>+/+</sup> and *VDR*<sup>-/-</sup> organoids, suggesting a gene dosage effect. As expected, ablating *VDR* diminished the induction of *Cyp24a1* and *S100g* (Fig. 3H), but had little effect on *Fgf15* and *Fabp6* (Fig. 3I). We noted that *VDR*<sup>-/-</sup> gut organoids still showed a small but significant increase in *Slc30a10* upon H10 and H90 treatment, suggesting possible residual activation by another transcription factor. Thus, we conclude that the induction of *Slc30a10* by low 12HBA pools is largely mediated by VDR.

### ***Effects of BA composition on other Mn transporters***

In addition to SLC30A10, enterocytes express at least two other Mn transporters. The Divalent Metal Transporter 1 (DMT1, encoded by *SLC11A2*) transports Mn from the intestinal lumen into enterocytes (31). SLC39A14 takes up Mn from the basolateral side of enterocytes (50), and it has been reported that SLC39A14 acts synergistically with SLC30A10 to mediate whole-body Mn excretion (50–52). However we found that BA treatments had no effects on *Slc11a2* or *Slc39a14* expression in murine organoids (Fig. 4A), and no effects on *SLC11A2* or *SLC39A14* in Caco-2 cells (Fig. 4B).

Another Mn transporter is SLC39A8. This protein is highly expressed in liver, where it is critical for Mn uptake from bile into hepatocytes (53). The localization and physiological relevance of SLC39A8 in intestine has not been reported. We found that gut organoids treated with H10 and M10 pools upregulated *Slc39a8* transcription more strongly than H90 and M90 pools (Fig. 4C). Caco-2 cells also showed increased *SLC39A8* expression upon H10, but not H90, treatment (Fig. 4D). Further analyses showed that, similar to *Slc30a10*, *Slc39a8* transcription was blunted upon removal of LCA



from BA pools, and in gut organoids from *VDR*<sup>-/-</sup> mice, whereas removal of CDCA from BA pools had no effect (Fig. 4E-G). These data support the possibility that both *Slc30a10* and *Slc39a8* are regulated by LCA-to-VDR signaling.

#### ***LCA and vitamin D induce Slc30a10 expression in mouse ileum***

To determine the distribution of *Slc30a10* and *Slc39a8* expression *in vivo*, we quantified mRNA expression in murine enterohepatic tissues. We found that all segments of the small intestine expressed *Slc30a10* mRNA at levels higher than the liver (Fig. 5A). We also detected *Slc39a8* expression in small intestine, at levels approximately 10-30% of those in liver (Fig. 5B).

Next, we tested whether LCA and VDR signaling induces expression of Mn transporters *in vivo*. We administered (i) vehicle, (ii) LCA, (iii) the VDR agonist calcitriol, or (iv) the 12HBA cholic acid (CA) to C57BL/6 mice by oral gavage and analyzed mRNA expression in ileal epithelia. Mice receiving LCA and calcitriol showed on average 4- to 6-fold increases in *Slc30a10* expression in ileum (Fig. 5C). The increase in *Slc30a10* expression was accompanied by increased *Cyp24a1* and *S100g* (Fig. 5D), consistent with activation of VDR. Notably, CA did not induce *Slc30a10*, *Cyp24a1*, or *S100g* (Fig. 5C-D). In contrast to the results of *ex vivo* and *in vitro* experiments, *Slc39a8* was not induced by any of the treatments (Fig. 5E). Interestingly, *Slc30a10* was also induced by LCA in jejunum, but not in duodenum or liver (Fig. 5F). These data show that *in vivo*, LCA promotes *Slc30a10* expression in ileum and jejunum.

#### **Discussion**

Our analyses reveal that BA composition regulates the expression of *Slc30a10* and cellular Mn efflux. SLC30A10 is one of three transporters identified thus far to be critical for whole-body Mn homeostasis in humans and mice (34, 35, 39, 40, 52, 54–56). We found that BA pools low in 12HBAs, which have increased abundance of the non-12HBA LCA, act primarily via VDR to promote *Slc30a10* expression. We also found that ileal *Slc30a10* was inducible by LCA and the VDR agonist calcitriol, indicating that LCA and VDR signaling modulate intestinal Mn transport.

Similar to BAs, a significant portion of Mn undergoes enterohepatic cycling (57, 58). Thus, enterocytes are exposed to luminal Mn from two sources: bile and diet. In adult humans, only about 3-5% of ingested Mn is absorbed (31), indicating robust regulation of intestinal Mn absorption. Obstructing the bile duct results in reduced excretion rates of intravenously administered <sup>54</sup>Mn in rats (59), highlighting the importance of Mn clearance by the liver and final excretion in the feces. But the intestine appears to play an important role in Mn homeostasis as well, especially when liver excretion has been saturated (60). While deletion of *Slc30a10* only in hepatocytes is insufficient to cause hypermanganesemia, combined deletion in liver and gastrointestinal tract causes severe hypermanganesemia and neurotoxicity (39, 41), mimicking the whole-body *Slc30a10* knockout mice, though less severe (39, 40). These findings support the notion that intestine and hepatobiliary excretion systems both participate in Mn homeostasis.

Mn is a cofactor for numerous metalloproteins involved in many cellular processes (31, 61). Yet, Mn in excess amounts is toxic. Hypermanganesemia results in dystonia, parkinsonism, polycythemia, and cirrhosis (31, 34, 35, 42, 52, 62, 63). Most cases of Mn toxicity are due to occupational and environmental exposures (31, 62). Mn toxicity has also been reported in cases of severe liver diseases, in patients receiving total parenteral nutrition, and in rare genetic loss-of-function mutations (34, 35, 44, 64–67). Current treatment for Mn toxicity is with chelation therapy, which increases urinary Mn excretion (44), but is nonspecific. Since the identification of disease-causing mutations of *SLC30A10*, there has been considerable progress in understanding how the transporter works and where it is localized in cells (36, 68). However, the regulation of the transporter is incompletely understood.

We identified BA composition, especially LCA abundance, as a modulator of *Slc30a10* expression *in vitro*, *ex vivo*, and in mouse ileum. We also showed that VDR is the primary mediator of this signaling pathway. This is consistent with a previous report showing VDR activation inducing *SLC30A10* in Caco-2 cells, and that this requires the VDRE in *SLC30A10*'s promoter region (45). Claro

## Bile acids regulate manganese transport

da Silva and colleagues previously reported increased *SLC30A10* mRNA levels in half of duodenal biopsies from volunteers administered oral calcitriol (0.5 µg for 10 days) (45). However, ileal biopsies were not reported, and ileum is expected to be the primary site of uptake of bile acids into enterocytes (49). Our data show that *Slc30a10* expression is induced by LCA and calcitriol *in vivo*, in mouse ileum. Published data from *in vitro* studies using Caco-2 cells and the neuroblastoma cell line SH-SY5Y have also proposed that the ER stress response factor ATF4 and the zinc-sensitive transcription factor ZNF658 contribute to *SLC30A10* regulation (69–71). The identification of this new BA-sensitive pathway may shed light on a known phenomenon: Mn poisoning has been reported in patients on total parenteral nutrition (65–67), suggesting that the lack of intestinal BA signaling leads to reduced SLC30A10 and impaired efflux of Mn from enterocytes into the intestinal lumen, consequently reducing Mn excretion.

In our experiments, *Slc30a10* induction was not completely abrogated upon removal of LCA from BA pools or deletion of VDR. Thus, other BAs and nuclear receptors might also contribute to BA-dependent induction of *Slc30a10*. A published ChIP-seq dataset identified two potential FXR binding sites within 1 kb of the first exon of mouse *Slc30a10*, and another potential site within 5 kb (72). Although these binding peaks are approximately an order of magnitude smaller than those seen for classical intestinal FXR targets *Fgf15* and *Slc51a* (72), it is possible that FXR participates in *Slc30a10* regulation at low levels or under certain conditions.

Does BA-dependent regulation of Mn homeostasis have any impact on cardiometabolic disease? Some researchers have reported that patients with type-2 diabetes have plasma or serum Mn at levels higher than controls, while others have reported the opposite (73–76). Because Mn levels must be maintained within a small range (31, 44), it makes sense that both deficiency and excess of Mn would lead to negative consequences. Accordingly, a recent report showed a U-shaped relationship between plasma Mn and the odds ratio for type-2 diabetes (77). When interpreting the previous findings, it should be noted that the most accurate

circulating Mn levels are obtained from whole blood, not serum or plasma, since over 60% of blood Mn is found in erythrocytes (78). Interestingly, intravenous glucose tolerance tests in individuals with chronic manganese revealed reactionary hypoglycemia, which was proposed to be due to dysregulation of the hypothalamus-pituitary-adrenal axis (79). Human genetic variants in *SLC39A8* are linked to blood Mn levels as well as body mass index, total cholesterol, and HDL-cholesterol (80–83). In an unusual case of diabetes, a patient showed hypoglycemia in response to oral MnCl<sub>2</sub>, which was abolished upon a partial pancreatectomy (84). Thus although severe Mn deficiency and toxicity lead to overt neurological and liver disorders, the role of Mn in common cardiometabolic diseases might be more nuanced.

Mechanistically, how could Mn contribute to features of cardiometabolic disease? Mn is a required or preferred cofactor for many enzymes, including arginase, phosphoenolpyruvate carboxykinase (PEPCK), and pyruvate carboxylase (PC) (31, 85). Arginase competes with endothelial nitric oxide synthase (eNOS) for their substrate, L-arginine (86). Increased arginase activity has been implicated in endothelial dysfunction in diabetic and atherosclerotic settings, and arginase inhibition has been proposed to improve microvascular complications such as diabetic nephropathy and retinopathy (87, 88). Importantly, arginase activity can be fine-tuned by Mn levels. This was demonstrated in liver extracts from mice rendered Mn-deficient by knockout of the Mn uptake transporter *Slc39a8*. In these livers, arginase activity was significantly lower than in liver extracts from control *Slc39a8*<sup>fl<sup>ox</sup>/fl<sup>ox</sup></sup> mice (53). Conversely, adding MnCl<sub>2</sub> to the reaction buffer or overexpressing SLC39A8 led to increased arginase activity (53). Interestingly, mice and rats rendered diabetic by streptozotocin injections showed increased liver arginase activity and increased hepatic Mn content (89), suggesting insulin signaling might regulate liver Mn levels and Mn-dependent enzymes. The liver enzymes PEPCK and PC catalyze critical steps for gluconeogenesis. Additionally, oxaloacetate production by PC can also enter other pathways, one of which is the TCA cycle, and reduced PC activity leads to build up of lactate (90, 91). Although Mn deficiency has been reported to reduce activities of these enzymes in

*Bile acids regulate manganese transport*

adult rats (92, 93), the effects of excess Mn on these enzymes have not been reported. Whether (a) BA regulation of SLC30A10 affects the activities of these Mn-dependent enzymes *in vivo* and (b) these Mn-sensitive enzymes partially mediate the relationship between BA composition and metabolic health are of interest for future investigations.

It has been well-established that BAs, and BA pool composition, regulate macronutrient metabolism. This work demonstrates that BAs and BA pool composition also regulate metal homeostasis, which may be relevant for health and disease.

## **Experimental Procedures**

### **Reagents**

Taurine-conjugated  $\alpha$ - and  $\beta$ -MCAs were purchased from Cayman Chemical. All other BAs, micelle components, corn oil, and  $MnCl_2$  were obtained from Sigma. Calcitriol was obtained from Selleck Chemicals. Unless noted otherwise, all cell culture media and supplements were purchased from Gibco.

### **Crypt isolation and gut organoid culture**

Mouse ileal crypts were isolated following methods developed by the Clevers Lab (30), with minor modifications. We euthanized adult (6-12 weeks old) mice using  $CO_2$  inhalation followed by cervical dislocation. With the exception of the growth medium, all solutions and Matrigel were kept ice-cold during handling of crypts and organoids. We divided the small intestine into 3 parts of equal length and collected the last segment, adjacent to the cecum. We cut open the ileum longitudinally and rinsed it in PBS. We minced the tissue and washed the pieces by vigorously pipetting in PBS, allowing the pieces to settle, and removing the cloudy supernatant. We repeated this wash step until the supernatant was clear, 4-6 times. We then transferred the pieces into PBS containing 2 mM EDTA and incubated the mixture at 4°C for 30-60 min with gentle shaking. Next, we removed the EDTA-PBS and replaced it with PBS containing 10% fetal bovine serum (FBS). We harvested crypts by vigorously pipetting, allowing the segments to settle, and collected the supernatant in a new tube. We repeated this harvesting procedure with additional FBS-PBS mixture, 3-4 times, pooling the supernatant from the same mouse. We then pelleted the crypts by centrifuging the crypts-FBS-PBS mixture at 900 rpm, 4°C for 5 min. We discarded the supernatant, resuspended the crypts in base medium (Advanced DMEM/F-12 supplemented with 2 mM GlutaMax, 100 U/ml penicillin-streptomycin, and 10 mM HEPES), and pelleted the crypts by centrifuging at 720 rpm, 4°C, 5 min. We discarded the supernatant, resuspended the crypts in base medium, passed the crypts-medium mixture through a 70- $\mu$ m cell strainer, and centrifuged the crypts-medium mixture at 900 rpm, 4°C, 5 min. Finally, we resuspend the crypts in Matrigel and seeded them on pre-warmed 24-well Nunclon Delta surface-treated plates. After 15-20 min incubation at 37°C, we added IntestiCult

Mouse Organoid Growth Medium (STEMCELL Technologies) to the wells. Medium was replaced twice weekly. Mature organoids were passaged every 7-10 days by dissolving the Matrigel dome with vigorous pipetting in PBS, passing the organoids-Matrigel-PBS mixture through a 27  $\frac{1}{2}$ -gauge needle, centrifuging to pellet the organoid pieces, resuspending them in new Matrigel, and distributing the organoid-Matrigel mixture into new pre-warmed multiwell plates.

### **Caco-2 cell culture**

Cells were cultured in DMEM containing GlutaMAX and high glucose, supplemented with 10% FBS and 100 U/ml penicillin-streptomycin and incubated in a 37°C, 5%  $CO_2$  chamber. Medium was replenished 3 times per week and cells were passaged by trypsinization every 5-7 days.

### **Preparation of micelles**

We prepared micelles as previously described (94) with minor modifications. Individual stock solutions of oleic acid (OA), 2-palmitoyl glycerol (2-PG), phosphatidylcholine (PC), cholesterol, GUDCA, and LCA were prepared in chloroform. Individual stock solutions of all other BAs were prepared in PBS. We mixed lipophilic components (those in chloroform stocks) in a glass vial and allowed them to dry under  $N_2$  stream. We mixed BAs to prepare four distinct BA pools: human low (10%) 12HBA (H10), human high (90%) 12HBA (H90), mouse low (10%) 12HBA (M10), and mouse high (90%) 12HBA (M90). After the lipophilic components dried, we added BA pools to the vials and vortexed the mixture. We further diluted the mixture with DMEM containing 0.2% BSA (base medium), yielding final concentrations of 0.6 mM OA, 0.2 mM 2-PG, 0.2 mM PC, 0.05 mM cholesterol, and 1 mM total BAs. Composition of BA pools are detailed in Table 1 and illustrated in Fig. 1B.

### **BA treatments of organoids and cells**

We removed gut organoids from Matrigel and exposed the lumens by pipetting in ice-cold PBS followed by centrifugation at 150g, 4°C for 10 min. Following a second PBS wash, we placed exposed gut organoids to micelle components without BAs (vehicle), or mixed micelles containing BAs (H10, H90, M10, or M90) in base medium (DMEM, 0.2% BSA) for 24 hours. For BA treatments in the



## *Bile acids regulate manganese transport*

absence of micelles, BA pools were prepared in PBS and diluted in base medium for a final concentration of 1 mM, to match the concentration in the mixed micelle treatments. For Caco-2 cells, we seeded 200,000 cells/well into 12-well plates and allowed cells to reach confluency. We replaced the growth medium, washed cells with PBS, added test media to the cells as indicated in the experiments.

### ***RNA sequencing***

We extracted RNA using the RNeasy Mini Kit (Qiagen). RNA concentration and quality were determined by Qubit Bioanalyzer. RNA from 3 samples per treatment group were submitted to the JP Sulzberger Columbia Genome Center for library preparation (standard poly-A pull-down for mRNA enrichment), RNA sequencing (30M depth, single read), and processing of raw data. Differential expression analysis on counts data was done using the DESeq2 package in R.

### ***Mn efflux assays***

Mn efflux assays were done as previously described (36). We collected organoids by dissolving the Matrigel dome with ice-cold PBS, pipetting, and centrifuging at 150 g for 10 min. Organoids were first incubated in 'exposure media' (DMEM supplemented with 0.2% BSA containing 0 or 500  $\mu$ M MnCl<sub>2</sub>) for 16h at 37°C, 5% CO<sub>2</sub>. Following exposure, organoids were washed with PBS, given media containing micelle components (vehicle), 1 mM H10, or 1 mM H90, and incubated for another 20h. Organoids were pelleted by centrifugation and efflux media were collected in metal-free tubes. For Mn efflux assay in Caco-2 cells, we followed the same procedure, with the exception of 100  $\mu$ M MnCl<sub>2</sub> for exposure. Mn was measured by inductively coupled plasma mass spectrometry (ICP-MS).

### ***Mouse experiments***

12 week-old male C57BL/6 mice (Taconic) were given AIN-93G with vitamin D adjusted at 50 IU/kg for 3 days before the experiment. Mice were housed in a facility with 12h light/12h dark cycle and had free access to food at all times. Ethanol (10%, vehicle), 0.8 mmol/kg LCA, 50 nmol/kg calcitriol, and 0.8 mmol/kg CA were dissolved in corn oil. Oral gavages were done at 14 h and 2 h prior to euthanasia. Experiments were approved by the Institutional Animal Care and Use Committee of Columbia University Medical Center. Doses and time points were based on previous studies by Ishizawa and colleagues (95). We collected ileum epithelia by cutting open the segment longitudinally and scraping the mucosa layer away from the muscle wall. Tissues were stored at -80°C until processed for RNA extraction.

### ***RNA extraction, cDNA synthesis, and qPCR***

We extracted RNA from gut organoids using the RNeasy Mini Kit (QIAGEN) and used 200 ng for cDNA synthesis. We extracted RNA from Caco-2 cells and ileum epithelium scrapings using TRIzol (Thermo Fisher) and used 1  $\mu$ g for cDNA synthesis. cDNA synthesis was done using the High Capacity cDNA Reverse Transcription Kit (Thermo Fisher). Quantitative real-time PCRs were carried out using iTaq Universal SYBR Green Supermix (Bio-Rad) and the CFX96 Real-Time PCR detection system (Bio-Rad). Mouse *36b4* or *B2m* were used as for reference genes for samples from mouse gut organoids and tissues. Human *RPLP0* (primers from QIAGEN) was used as reference gene for cDNA from Caco-2 samples. Primer sequences are listed in Supp. Table 3.

### ***Statistical analysis***

Unless noted otherwise, we used one-way ANOVA followed by Benjamini-Hochberg correction. Adjusted p-values less than 0.05 were considered significant, with \* $p$ <0.05, \*\* $p$ <0.01, and \*\*\* $p$ <0.001 between groups as marked.

*Bile acids regulate manganese transport*

**Acknowledgements:** The authors would like to acknowledge Ana Flete and Thomas Kolar for technical assistance. This work was supported by funding from the NIH–DK115825 to RAH and T32DK007328 to TRA—and the Russell Berrie Foundation. This research was funded in part through the NIH/NCI Cancer Center Support Grant P30CA013696 and used the Genomics and High Throughput Screening Shared Resource.

**Conflict of interest:** The authors declare that they have no conflicts of interest with the contents of this article.

## References

1. de Aguiar Vallim, T. Q., Tarling, E. J., and Edwards, P. A. (2013) Pleiotropic Roles of Bile Acids in Metabolism. *Cell Metabolism*. **17**, 657–669
2. Chávez-Talavera, O., Tailleux, A., Lefebvre, P., and Staels, B. (2017) Bile Acid Control of Metabolism and Inflammation in Obesity, Type 2 Diabetes, Dyslipidemia, and Nonalcoholic Fatty Liver Disease. *Gastroenterology*. **152**, 1679-1694.e3
3. de Boer, J. F., Bloks, V. W., Verkade, E., Heiner-Fokkema, M. R., and Kuipers, F. (2018) New insights in the multiple roles of bile acids and their signaling pathways in metabolic control: *Current Opinion in Lipidology*. **29**, 194–202
4. Ahmad, T. R., and Haeusler, R. A. (2019) Bile acids in glucose metabolism and insulin signalling — mechanisms and research needs. *Nat Rev Endocrinol*. **15**, 701–712
5. Parks, D. J. (1999) Bile Acids: Natural Ligands for an Orphan Nuclear Receptor. *Science*. **284**, 1365–1368
6. Makishima, M. (1999) Identification of a Nuclear Receptor for Bile Acids. *Science*. **284**, 1362–1365
7. Maruyama, T., Miyamoto, Y., Nakamura, T., Tamai, Y., Okada, H., Sugiyama, E., Nakamura, T., Itadani, H., and Tanaka, K. (2002) Identification of membrane-type receptor for bile acids (M-BAR). *Biochem. Biophys. Res. Commun*. **298**, 714–719
8. Kawamata, Y., Fujii, R., Hosoya, M., Harada, M., Yoshida, H., Miwa, M., Fukusumi, S., Habata, Y., Itoh, T., Shintani, Y., Hinuma, S., Fujisawa, Y., and Fujino, M. (2003) A G protein-coupled receptor responsive to bile acids. *J. Biol. Chem*. **278**, 9435–9440
9. Wang, H., Chen, J., Hollister, K., Sowers, L. C., and Forman, B. M. (1999) Endogenous bile acids are ligands for the nuclear receptor FXR/BAR. *Mol. Cell*. **3**, 543–553
10. Makishima, M. (2002) Vitamin D Receptor As an Intestinal Bile Acid Sensor. *Science*. **296**, 1313–1316
11. Hofmann, A. F., and Roda, A. (1984) Physicochemical properties of bile acids and their relationship to biological properties: an overview of the problem. *J. Lipid Res*. **25**, 1477–1489
12. Russell, D. W. (2009) Fifty years of advances in bile acid synthesis and metabolism. *J. Lipid Res*. **50**, S120–S125
13. Li-Hawkins, J., Gåfvels, M., Olin, M., Lund, E. G., Andersson, U., Schuster, G., Björkhem, I., Russell, D. W., and Eggertsen, G. (2002) Cholic acid mediates negative feedback regulation of bile acid synthesis in mice. *J Clin Invest*. **110**, 1191–1200
14. Haeusler, R. A., Astiarraga, B., Camastra, S., Accili, D., and Ferrannini, E. (2013) Human insulin resistance is associated with increased plasma levels of 12 $\alpha$ -hydroxylated bile acids. *Diabetes*. **62**, 4184–4191
15. Choucair, I., Nemet, I., Li, L., Cole, M. A., Skye, S. M., Kirsop, J. D., Fischbach, M., Gogonea, V., Brown, J. M., Tang, W. H. W., and Hazen, S. L. (2019) Quantification of bile acids: A mass spectrometry platform for studying gut microbe connection to metabolic diseases. *J. Lipid Res*. 10.1194/jlr.RA119000311
16. Brufau, G., Stellaard, F., Prado, K., Bloks, V. W., Jonkers, E., Boverhof, R., Kuipers, F., and Murphy, E. J. (2010) Improved glycemic control with colestevlam treatment in patients with type 2 diabetes is not directly associated with changes in bile acid metabolism. *Hepatology*. **52**, 1455–1464
17. Haeusler, R. A., Camastra, S., Nannipieri, M., Astiarraga, B., Castro-Perez, J., Xie, D., Wang, L., Chakravarthy, M., and Ferrannini, E. (2016) Increased Bile Acid Synthesis and Impaired Bile Acid Transport in Human Obesity. *The Journal of Clinical Endocrinology & Metabolism*. **101**, 1935–1944
18. Slätis, K., Gåfvels, M., Kannisto, K., Ovchinnikova, O., Paulsson-Berne, G., Parini, P., Jiang, Z.-Y., and Eggertsen, G. (2010) Abolished synthesis of cholic acid reduces atherosclerotic development in apolipoprotein E knockout mice. *J. Lipid Res*. **51**, 3289–3298

19. Bonde, Y., Eggertsen, G., and Rudling, M. (2016) Mice Abundant in Muricholic Bile Acids Show Resistance to Dietary Induced Steatosis, Weight Gain, and to Impaired Glucose Metabolism. *PLoS ONE*. **11**, e0147772
20. Bertaggia, E., Jensen, K. K., Castro-Perez, J., Xu, Y., Di Paolo, G., Chan, R. B., Wang, L., and Haeusler, R. A. (2017) Cyp8b1 ablation prevents Western diet-induced weight gain and hepatic steatosis because of impaired fat absorption. *Am. J. Physiol. Endocrinol. Metab.* **313**, E121–E133
21. Kaur, A., Patankar, J. V., de Haan, W., Ruddle, P., Wijesekara, N., Groen, A. K., Verchere, C. B., Singaraja, R. R., and Hayden, M. R. (2015) Loss of Cyp8b1 improves glucose homeostasis by increasing GLP-1. *Diabetes*. **64**, 1168–1179
22. McGavigan, A. K., Garibay, D., Henseler, Z. M., Chen, J., Bettaieb, A., Haj, F. G., Ley, R. E., Chouinard, M. L., and Cummings, B. P. (2017) TGR5 contributes to glucoregulatory improvements after vertical sleeve gastrectomy in mice. *Gut*. **66**, 226–234
23. Chevre, R., Trigueros-Motos, L., Castaño, D., Chua, T., Corliano, M., Patankar, J. V., Sng, L., Sim, L., Juin, T. L., Carissimo, G., Ng, L. F. P., Yi, C. N. J., Eliathamby, C. C., Groen, A. K., Hayden, M. R., and Singaraja, R. R. (2018) Therapeutic modulation of the bile acid pool by Cyp8b1 knockdown protects against nonalcoholic fatty liver disease in mice. *The FASEB Journal*. **32**, 3792–3802
24. Clarysse, S., Tack, J., Lammert, F., Duchateau, G., Reppas, C., and Augustijns, P. (2009) Postprandial Evolution in Composition and Characteristics of Human Duodenal Fluids in Different Nutritional States. *Journal of Pharmaceutical Sciences*. **98**, 1177–1192
25. Northfield, T. C., and McColl, I. (1973) Postprandial concentrations of free and conjugated bile acids down the length of the normal human small intestine. *Gut*. **14**, 513–518
26. Thomas, C., Gioiello, A., Noriega, L., Strehle, A., Oury, J., Rizzo, G., Macchiarulo, A., Yamamoto, H., Matak, C., Pruzanski, M., Pellicciari, R., Auwerx, J., and Schoonjans, K. (2009) TGR5-mediated bile acid sensing controls glucose homeostasis. *Cell Metab.* **10**, 167–177
27. Alemi, F., Poole, D. P., Chiu, J., Schoonjans, K., Cattaruzza, F., Grider, J. R., Bunnett, N. W., and Corvera, C. U. (2013) The Receptor TGR5 Mediates the Prokinetic Actions of Intestinal Bile Acids and Is Required for Normal Defecation in Mice. *Gastroenterology*. **144**, 145–154
28. Bunnett, N. W. (2014) Neuro-humoral signalling by bile acids and the TGR5 receptor in the gastrointestinal tract. *The Journal of Physiology*. **592**, 2943–2950
29. Bouillon, R., Carmeliet, G., Verlinden, L., van Etten, E., Verstuyf, A., Luderer, H. F., Lieben, L., Mathieu, C., and Demay, M. (2008) Vitamin D and Human Health: Lessons from Vitamin D Receptor Null Mice. *Endocrine Reviews*. **29**, 726–776
30. Sato, T., Vries, R. G., Snippert, H. J., van de Wetering, M., Barker, N., Stange, D. E., van Es, J. H., Abo, A., Kujala, P., Peters, P. J., and Clevers, H. (2009) Single Lgr5 stem cells build crypt-villus structures in vitro without a mesenchymal niche. *Nature*. **459**, 262–265
31. Chen, P., and Aschner, M. (2018) Manganese metabolism in humans. *Front Biosci.* **23**, 1655–1679
32. Wahlström, A., Kovatcheva-Datchary, P., Ståhlman, M., Khan, M.-T., Bäckhed, F., and Marschall, H.-U. (2017) Induction of farnesoid X receptor signaling in germ-free mice colonized with a human microbiota. *Journal of Lipid Research*. **58**, 412–419
33. Li, J., and Dawson, P. A. (2019) Animal models to study bile acid metabolism. *Biochimica et Biophysica Acta (BBA) - Molecular Basis of Disease*. **1865**, 895–911
34. Tuschl, K., Clayton, P. T., Gospe, S. M., Gulab, S., Ibrahim, S., Singhi, P., Aulakh, R., Ribeiro, R. T., Barsottini, O. G., Zaki, M. S., Del Rosario, M. L., Dyack, S., Price, V., Rideout, A., Gordon, K., Wevers, R. A., “Kling” Chong, W. K., and Mills, P. B. (2012) Syndrome of Hepatic Cirrhosis, Dystonia, Polycythemia, and Hypermanganesemia Caused by Mutations in SLC30A10, a Manganese Transporter in Man. *The American Journal of Human Genetics*. **90**, 457–466
35. Quadri, M., Federico, A., Zhao, T., Breedveld, G. J., Battisti, C., Delnooz, C., Severijnen, L.-A., Di Toro Mammarella, L., Mignarri, A., Monti, L., Sanna, A., Lu, P., Punzo, F., Cossu, G., Willemsen, R., Rasi, F., Oostra, B. A., van de Warrenburg, B. P., and Bonifati, V. (2012) Mutations

- in SLC30A10 Cause Parkinsonism and Dystonia with Hypermanganesemia, Polycythemia, and Chronic Liver Disease. *The American Journal of Human Genetics*. **90**, 467–477
36. Leyva-Illades, D., Chen, P., Zogzas, C. E., Hutchens, S., Mercado, J. M., Swaim, C. D., Morrisett, R. A., Bowman, A. B., Aschner, M., and Mukhopadhyay, S. (2014) SLC30A10 Is a Cell Surface-Localized Manganese Efflux Transporter, and Parkinsonism-Causing Mutations Block Its Intracellular Trafficking and Efflux Activity. *Journal of Neuroscience*. **34**, 14079–14095
  37. Nishito, Y., Tsuji, N., Fujishiro, H., Takeda, T., Yamazaki, T., Teranishi, F., Okazaki, F., Matsunaga, A., Tuschl, K., Rao, R., Kono, S., Miyajima, H., Narita, H., Himeno, S., and Kambe, T. (2016) Direct Comparison of Manganese Detoxification/Efflux Proteins and Molecular Characterization of ZnT10 Protein as a Manganese Transporter. *Journal of Biological Chemistry*. **291**, 14773–14787
  38. Zogzas, C. E., Aschner, M., and Mukhopadhyay, S. (2016) Structural Elements in the Transmembrane and Cytoplasmic Domains of the Metal Transporter SLC30A10 Are Required for Its Manganese Efflux Activity. *Journal of Biological Chemistry*. **291**, 15940–15957
  39. Mercadante, C. J., Prajapati, M., Conboy, H. L., Dash, M. E., Herrera, C., Pettiglio, M. A., Cintron-Rivera, L., Salesky, M. A., Rao, D. B., and Bartnikas, T. B. (2019) Manganese transporter Slc30a10 controls physiological manganese excretion and toxicity. *J Clin Invest*. **129**, 5442–5461
  40. Hutchens, S., Liu, C., Jursa, T., Shawlot, W., Chaffee, B. K., Yin, W., Gore, A. C., Aschner, M., Smith, D. R., and Mukhopadhyay, S. (2017) Deficiency in the manganese efflux transporter SLC30A10 induces severe hypothyroidism in mice. *Journal of Biological Chemistry*. **292**, 9760–9773
  41. Taylor, C. A., Hutchens, S., Liu, C., Jursa, T., Shawlot, W., Aschner, M., Smith, D. R., and Mukhopadhyay, S. (2019) SLC30A10 transporter in the digestive system regulates brain manganese under basal conditions while brain SLC30A10 protects against neurotoxicity. *J. Biol. Chem*. **294**, 1860–1876
  42. Stamelou, M., Tuschl, K., Chong, W. K., Burroughs, A. K., Mills, P. B., Bhatia, K. P., and Clayton, P. T. (2012) Dystonia with brain manganese accumulation resulting from SLC30A10 mutations: A new treatable disorder. *Movement Disorders*. **27**, 1317–1322
  43. Mukhtiar, K., Ibrahim, S., Tuschl, K., and Mills, P. (2016) Hypermanganesemia with Dystonia, Polycythemia and Cirrhosis (HMDPC) due to mutation in the SLC30A10 gene. *Brain and Development*. **38**, 862–865
  44. Anagianni, S., and Tuschl, K. (2019) Genetic Disorders of Manganese Metabolism. *Curr Neurol Neurosci Rep*. **19**, 33
  45. Claro da Silva, T., Hiller, C., Gai, Z., and Kullak-Ublick, G. A. (2016) Vitamin D 3 transactivates the zinc and manganese transporter SLC30A10 via the Vitamin D receptor. *The Journal of Steroid Biochemistry and Molecular Biology*. **163**, 77–87
  46. Mallory, A., Kern, F., Smith, J., and Savage, D. (1973) Patterns of Bile Acids and Microflora in the Human Small Intestine. *Gastroenterology*. **64**, 26–33
  47. Ridlon, J. M., Kang, D.-J., and Hylemon, P. B. (2006) Bile salt biotransformations by human intestinal bacteria. *J. Lipid Res*. **47**, 241–259
  48. Kramer, W., Stengelin, S., Baringhaus, K.-H., Enhsen, A., Heuer, H., Becker, W., Corsiero, D., Girbig, F., Noll, R., and Weyland, C. (1999) Substrate specificity of the ileal and the hepatic Na<sup>+</sup>/bile acid cotransporters of the rabbit. I. Transport studies with membrane vesicles and cell lines expressing the cloned transporters. *J. Lipid Res*. **40**, 1604–1617
  49. Dawson, P. A., and Karpen, S. J. (2015) Intestinal transport and metabolism of bile acids. *J. Lipid Res*. **56**, 1085–1099
  50. Scheiber, I. F., Wu, Y., Morgan, S. E., and Zhao, N. (2019) The intestinal metal transporter ZIP14 maintains systemic manganese homeostasis. *J. Biol. Chem*. **294**, 9147–9160
  51. Liu, C., Hutchens, S., Jursa, T., Shawlot, W., Polishchuk, E. V., Polishchuk, R. S., Dray, B. K., Gore, A. C., Aschner, M., Smith, D. R., and Mukhopadhyay, S. (2017) Hypothyroidism induced by



- loss of the manganese efflux transporter SLC30A10 may be explained by reduced thyroxine production. *J. Biol. Chem.* **292**, 16605–16615
52. Mukhopadhyay, S. (2018) Familial manganese-induced neurotoxicity due to mutations in SLC30A10 or SLC39A14. *NeuroToxicology.* **64**, 278–283
  53. Lin, W., Vann, D. R., Doulias, P.-T., Wang, T., Landesberg, G., Li, X., Ricciotti, E., Scalia, R., He, M., Hand, N. J., and Rader, D. J. (2017) Hepatic metal ion transporter ZIP8 regulates manganese homeostasis and manganese-dependent enzyme activity. *Journal of Clinical Investigation.* **127**, 2407–2417
  54. Park, J. H., Hoglebe, M., Grüneberg, M., DuChesne, I., von der Heiden, A. L., Reunert, J., Schlingmann, K. P., Boycott, K. M., Beaulieu, C. L., Mhanni, A. A., Innes, A. M., Hörtnagel, K., Biskup, S., Gleixner, E. M., Kurlmann, G., Fiedler, B., Omran, H., Rutsch, F., Wada, Y., Tsiakas, K., Santer, R., Nebert, D. W., Rust, S., and Marquardt, T. (2015) SLC39A8 Deficiency: A Disorder of Manganese Transport and Glycosylation. *The American Journal of Human Genetics.* **97**, 894–903
  55. Xin, Y., Gao, H., Wang, J., Qiang, Y., Imam, M. U., Li, Y., Wang, J., Zhang, R., Zhang, H., Yu, Y., Wang, H., Luo, H., Shi, C., Xu, Y., Hojyo, S., Fukada, T., Min, J., and Wang, F. (2017) Manganese transporter Slc39a14 deficiency revealed its key role in maintaining manganese homeostasis in mice. *Cell Discovery.* **3**, 17025
  56. Aydemir, T. B., Kim, M.-H., Kim, J., Colon-Perez, L. M., Banan, G., Mareci, T. H., Febo, M., and Cousins, R. J. (2017) Metal Transporter Zip14 (Slc39a14) Deletion in Mice Increases Manganese Deposition and Produces Neurotoxic Signatures and Diminished Motor Activity. *J. Neurosci.* **37**, 5996–6006
  57. Cikrt, I. (1973) Enterohepatic Circulation of <sup>64</sup>Cu, <sup>52</sup>Mn and <sup>203</sup>Hg in Rats. *Archiv für Toxikologie.* **31**, 51–59
  58. Tichý, M., and Cikrt, M. (1972) Manganese transfer into the bile in rats. *Arch Toxicol.* **29**, 51–58
  59. Cotzias, G. C., and Papavasiliou, P. S. (1964) Primordial Homeostasis in a Mammal as shown by the Control of Manganese. *Nature.* **201**, 828–829
  60. Bertinchamps, A. J., Miller, S. T., and Cotzias, G. C. (1966) Interdependence of routes excreting manganese. *American Journal of Physiology-Legacy Content.* **211**, 217–224
  61. Hurley, L. S. (1981) The roles of trace elements in foetal and neonatal development. *Philos. Trans. Royal Soc.*
  62. Andruska, K. M., and Racette, B. A. (2015) Neuromythology of Manganism. *Curr Epidemiol Rep.* **2**, 143–148
  63. Tuschl, K., Meyer, E., Valdivia, L. E., Zhao, N., Dadswell, C., Abdul-Sada, A., Hung, C. Y., Simpson, M. A., Chong, W. K., Jacques, T. S., Woltjer, R. L., Eaton, S., Gregory, A., Sanford, L., Kara, E., Houlden, H., Cuno, S. M., Prokisch, H., Valletta, L., Tiranti, V., Younis, R., Maher, E. R., Spencer, J., Straatman-Iwanowska, A., Gissen, P., Selim, L. A. M., Pintos-Morell, G., Coroleu-Lletget, W., Mohammad, S. S., Yoganathan, S., Dale, R. C., Thomas, M., Rihel, J., Bodamer, O. A., Enns, C. A., Hayflick, S. J., Clayton, P. T., Mills, P. B., Kurian, M. A., and Wilson, S. W. (2016) Mutations in *SLC39A14* disrupt manganese homeostasis and cause childhood-onset parkinsonism–dystonia. *Nature Communications.* **7**, 11601
  64. Krieger, D., Krieger, S., Theilmann, L., Jansen, O., Gass, P., and Lichtnecker, H. (1995) Manganese and chronic hepatic encephalopathy. *The Lancet.* **346**, 270–274
  65. Fell, J. M. E., Meadows, N., Khan, K., Long, S. G., Milla, P. J., Reynolds, A. P., Quaghebeur, G., and Taylor, W. J. (1996) Manganese toxicity in children receiving long-term parenteral nutrition. *The Lancet.* **347**, 1218–1221
  66. Aschner, J. L., Anderson, A., Slaughter, J. C., Aschner, M., Steele, S., Beller, A., Mouvery, A., Furlong, H. M., and Maitre, N. L. (2015) Neuroimaging identifies increased manganese deposition in infants receiving parenteral nutrition. *Am J Clin Nutr.* **102**, 1482–1489
  67. Hsieh, C.-T., Liang, J.-S., Peng, S. S.-F., and Lee, W.-T. (2007) Seizure Associated With Total Parenteral Nutrition–Related Hypermanganesemia. *Pediatric Neurology.* **36**, 181–183

68. Levy, M., Elkoshi, N., Barber-Zucker, S., Hoch, E., Zarivach, R., Hershinkel, M., and Sekler, I. (2019) Zinc transporter 10 (ZnT10)-dependent extrusion of cellular Mn<sup>2+</sup> is driven by an active Ca<sup>2+</sup>-coupled exchange. *J. Biol. Chem.* **294**, 5879–5889
69. Coneyworth, L. J., Jackson, K. A., Tyson, J., Bosomworth, H. J., Hagen, E. van der, Hann, G. M., Ogo, O. A., Swann, D. C., Mathers, J. C., Valentine, R. A., and Ford, D. (2012) Identification of the Human Zinc Transcriptional Regulatory Element (ZTRE) A PALINDROMIC PROTEIN-BINDING DNA SEQUENCE RESPONSIBLE FOR ZINC-INDUCED TRANSCRIPTIONAL REPRESSION. *J. Biol. Chem.* **287**, 36567–36581
70. Ogo, O. A., Tyson, J., Cockell, S. J., Howard, A., Valentine, R. A., and Ford, D. (2015) The Zinc Finger Protein ZNF658 Regulates the Transcription of Genes Involved in Zinc Homeostasis and Affects Ribosome Biogenesis through the Zinc Transcriptional Regulatory Element. *Molecular and Cellular Biology.* **35**, 977–987
71. Go, S., Kurita, H., Yokoo, K., Inden, M., Kambe, T., and Hozumi, I. (2017) Protective function of SLC30A10 induced via PERK-ATF4 pathway against 1-methyl-4-phenylpyridinium. *Biochemical and Biophysical Research Communications.* **490**, 1307–1313
72. Thomas, A. M., Hart, S. N., Kong, B., Fang, J., Zhong, X., and Guo, G. L. (2010) Genome-wide tissue-specific farnesoid X receptor binding in mouse liver and intestine. *Hepatology.* **51**, 1410–1419
73. Kaur, B., and Henry, J. (2014) Chapter Two - Micronutrient Status in Type 2 Diabetes: A Review. in *Advances in Food and Nutrition Research* (Henry, J. ed), pp. 55–100, Academic Press, **71**, 55–100
74. Mancini, F. R., Dow, C., Affret, A., Rajaobelina, K., Dartois, L., Balkau, B., Bonnet, F., Boutron-Ruault, M.-C., and Fagherazzi, G. (2018) Micronutrient dietary patterns associated with type 2 diabetes mellitus among women of the E3N-EPIC (Etude Epidémiologique auprès de femmes de l'Education Nationale) cohort study. *Journal of Diabetes.* **10**, 665–674
75. Wang, X., Zhang, M., Lui, G., Chang, H., Zhang, M., Liu, W., Li, Z., Liu, Y., and Huang, G. (2016) Associations of Serum Manganese Levels with Prediabetes and Diabetes among ≥60-Year-Old Chinese Adults: A Population-Based Cross-Sectional Analysis. *Nutrients.* **8**, 497
76. Du, S., Wu, X., Han, T., Duan, W., Liu, L., Qi, J., Niu, Y., Na, L., and Sun, C. (2018) Dietary manganese and type 2 diabetes mellitus: two prospective cohort studies in China. *Diabetologia.* **61**, 1985–1995
77. Shan Zhilei, Chen Sijing, Sun Taoping, Luo Cheng, Guo Yanjun, Yu Xuefeng, Yang Wei, Hu Frank B., and Liu Liegang (2016) U-Shaped Association between Plasma Manganese Levels and Type 2 Diabetes. *Environmental Health Perspectives.* **124**, 1876–1881
78. Milne, D. B., Sims, R. L., and Ralston, N. V. C. (1990) Manganese Content of the Cellular Components of Blood. *Clinical Chemistry.* **36**, 450–452
79. Hassanein, M., Ghaleb, H. A., Haroun, E. A., Hegazy, M. R., and Khayyal, M. A. H. (1966) Chronic Manganism: Preliminary Observations on Glucose Tolerance and Serum Proteins. *Occupational and Environmental Medicine.* **23**, 67–70
80. Teslovich, T. M., Musunuru, K., Smith, A. V., Edmondson, A. C., Stylianou, I. M., Koseki, M., Pirruccello, J. P., Ripatti, S., Chasman, D. I., Willer, C. J., Johansen, C. T., Fouchier, S. W., Isaacs, A., Peloso, G. M., Barbalic, M., Ricketts, S. L., Bis, J. C., Aulchenko, Y. S., Thorleifsson, G., Feitosa, M. F., Chambers, J., Orho-Melander, M., Melander, O., Johnson, T., Li, X., Guo, X., Li, M., Shin Cho, Y., Jin Go, M., Jin Kim, Y., Lee, J.-Y., Park, T., Kim, K., Sim, X., Twee-Hee Ong, R., Croteau-Chonka, D. C., Lange, L. A., Smith, J. D., Song, K., Hua Zhao, J., Yuan, X., Luan, J., Lamina, C., Ziegler, A., Zhang, W., Zee, R. Y. L., Wright, A. F., Witteman, J. C. M., Wilson, J. F., Willemsen, G., Wichmann, H.-E., Whitfield, J. B., Waterworth, D. M., Wareham, N. J., Waeber, G., Vollenweider, P., Voight, B. F., Vitart, V., Uitterlinden, A. G., Uda, M., Tuomilehto, J., Thompson, J. R., Tanaka, T., Surakka, I., Stringham, H. M., Spector, T. D., Soranzo, N., Smit, J. H., Sinisalo, J., Silander, K., Sijbrands, E. J. G., Scuteri, A., Scott, J., Schlessinger, D., Sanna, S., Salomaa, V., Saharinen, J., Sabatti, C., Ruukonen, A., Rudan, I., Rose, L. M., Roberts, R., Rieder, M., Psaty, B.

- M., Pramstaller, P. P., Pichler, I., Perola, M., Penninx, B. W. J. H., Pedersen, N. L., Pattaro, C., Parker, A. N., Pare, G., Oostra, B. A., O'Donnell, C. J., Nieminen, M. S., Nickerson, D. A., Montgomery, G. W., Meitinger, T., McPherson, R., McCarthy, M. I., McArdle, W., Masson, D., Martin, N. G., Marroni, F., Mangino, M., Magnusson, P. K. E., Lucas, G., Luben, R., Loos, R. J. F., Lokki, M.-L., Lettre, G., Langenberg, C., Launer, L. J., Lakatta, E. G., Laaksonen, R., Kyvik, K. O., Kronenberg, F., König, I. R., Khaw, K.-T., Kaprio, J., Kaplan, L. M., Johansson, Å., Jarvelin, M.-R., Cecile J. W. Janssens, A., Ingelsson, E., Igl, W., Kees Hovingh, G., Hottenga, J.-J., Hofman, A., Hicks, A. A., Hengstenberg, C., Heid, I. M., Hayward, C., Havulinna, A. S., Hastie, N. D., Harris, T. B., Haritunians, T., Hall, A. S., Gyllenstein, U., Guiducci, C., Groop, L. C., Gonzalez, E., Gieger, C., Freimer, N. B., Ferrucci, L., Erdmann, J., Elliott, P., Ejebe, K. G., Döring, A., Dominiczak, A. F., Demissie, S., Deloukas, P., de Geus, E. J. C., de Faire, U., Crawford, G., Collins, F. S., Chen, Y. I., Caulfield, M. J., Campbell, H., Burt, N. P., Bonnycastle, L. L., Boomsma, D. I., Boekholdt, S. M., Bergman, R. N., Barroso, I., Bandinelli, S., Ballantyne, C. M., Assimes, T. L., Quertermous, T., Altshuler, D., Seielstad, M., Wong, T. Y., Tai, E.-S., Feranil, A. B., Kuzawa, C. W., Adair, L. S., Taylor Jr, H. A., Borecki, I. B., Gabriel, S. B., Wilson, J. G., Holm, H., Thorsteinsdottir, U., Gudnason, V., Krauss, R. M., Mohlke, K. L., Ordovas, J. M., Munroe, P. B., Kooner, J. S., Tall, A. R., Hegele, R. A., Kastelein, J. J. P., Schadt, E. E., Rotter, J. I., Boerwinkle, E., Strachan, D. P., Mooser, V., Stefansson, K., Reilly, M. P., Samani, N. J., Schunkert, H., Cupples, L. A., Sandhu, M. S., Ridker, P. M., Rader, D. J., van Duijn, C. M., Peltonen, L., Abecasis, G. R., Boehnke, M., and Kathiresan, S. (2010) Biological, clinical and population relevance of 95 loci for blood lipids. *Nature*. **466**, 707–713
81. Speliotes, E. K., Willer, C. J., Berndt, S. I., Monda, K. L., Thorleifsson, G., Jackson, A. U., Allen, H. L., Lindgren, C. M., Luan, J., Mägi, R., Randall, J. C., Vedantam, S., Winkler, T. W., Qi, L., Workalemahu, T., Heid, I. M., Steinthorsdottir, V., Stringham, H. M., Weedon, M. N., Wheeler, E., Wood, A. R., Ferreira, T., Weyant, R. J., Segrè, A. V., Estrada, K., Liang, L., Nemesh, J., Park, J.-H., Gustafsson, S., Kilpeläinen, T. O., Yang, J., Bouatia-Naji, N., Esko, T., Feitosa, M. F., Kutalik, Z., Mangino, M., Raychaudhuri, S., Scherag, A., Smith, A. V., Welch, R., Zhao, J. H., Aben, K. K., Absher, D. M., Amin, N., Dixon, A. L., Fisher, E., Glazer, N. L., Goddard, M. E., Heard-Costa, N. L., Hoesel, V., Hottenga, J.-J., Johansson, Å., Johnson, T., Ketkar, S., Lamina, C., Li, S., Moffatt, M. F., Myers, R. H., Narisu, N., Perry, J. R. B., Peters, M. J., Preuss, M., Ripatti, S., Rivadeneira, F., Sandholt, C., Scott, L. J., Timpson, N. J., Tyrer, J. P., van Wingerden, S., Watanabe, R. M., White, C. C., Wiklund, F., Barlassina, C., Chasman, D. I., Cooper, M. N., Jansson, J.-O., Lawrence, R. W., Pellikka, N., Prokopenko, I., Shi, J., Thiering, E., Alavere, H., Alibrandi, M. T. S., Almgren, P., Arnold, A. M., Aspelund, T., Atwood, L. D., Balkau, B., Balmforth, A. J., Bennett, A. J., Ben-Shlomo, Y., Bergman, R. N., Bergmann, S., Biebertmann, H., Blakemore, A. I. F., Boes, T., Bonnycastle, L. L., Bornstein, S. R., Brown, M. J., Buchanan, T. A., Busonero, F., Campbell, H., Cappuccio, F. P., Cavalcanti-Proença, C., Chen, Y.-D. I., Chen, C.-M., Chines, P. S., Clarke, R., Coin, L., Connell, J., Day, I. N. M., Heijer, M. den, Duan, J., Ebrahim, S., Elliott, P., Elosua, R., Eiriksdottir, G., Erdos, M. R., Eriksson, J. G., Facheris, M. F., Felix, S. B., Fischer-Posovszky, P., Folsom, A. R., Friedrich, N., Freimer, N. B., Fu, M., Gaget, S., Gejman, P. V., Geus, E. J. C., Gieger, C., Gjesing, A. P., Goel, A., Goyette, P., Grallert, H., Gräßler, J., Greenawalt, D. M., Groves, C. J., Gudnason, V., Guiducci, C., Hartikainen, A.-L., Hassanali, N., Hall, A. S., Havulinna, A. S., Hayward, C., Heath, A. C., Hengstenberg, C., Hicks, A. A., Hinney, A., Hofman, A., Homuth, G., Hui, J., Igl, W., Iribarren, C., Isomaa, B., Jacobs, K. B., Jarick, I., Jewell, E., John, U., Jørgensen, T., Jousilahti, P., Jula, A., Kaakinen, M., Kajantie, E., Kaplan, L. M., Kathiresan, S., Kettunen, J., Kinnunen, L., Knowles, J. W., Kolcic, I., König, I. R., Koskinen, S., Kovacs, P., Kuusisto, J., Kraft, P., Kvaløy, K., Laitinen, J., Lantieri, O., Lanzani, C., Launer, L. J., Lecoeur, C., Lehtimäki, T., Lettre, G., Liu, J., Lokki, M.-L., Lorentzon, M., Luben, R. N., Ludwig, B., Magic, Manunta, P., Marek, D., Marre, M., Martin, N. G., McArdle, W. L., McCarthy, A., McKnight, B., Meitinger, T., Melander, O., Meyre, D., Midthjell, K., Montgomery, G. W., Morken, M. A., Morris, A. P., Mulic, R., Ngwa, J. S., Nelis, M., Neville, M. J., Nyholt, D. R., O'Donnell, C. J., O'Rahilly,

- S., Ong, K. K., Oostra, B., Paré, G., Parker, A. N., Perola, M., Pichler, I., Pietiläinen, K. H., Platou, C. G. P., Polasek, O., Pouta, A., Rafelt, S., Raitakari, O., Rayner, N. W., Ridderstråle, M., Rief, W., Ruukonen, A., Robertson, N. R., Rzehak, P., Salomaa, V., Sanders, A. R., Sandhu, M. S., Sanna, S., Saramies, J., Savolainen, M. J., Scherag, S., Schipf, S., Schreiber, S., Schunkert, H., Silander, K., Sinisalo, J., Siscovick, D. S., Smit, J. H., Soranzo, N., Sovio, U., Stephens, J., Surakka, I., Swift, A. J., Tammesoo, M.-L., Tardif, J.-C., Teder-Laving, M., Teslovich, T. M., Thompson, J. R., Thomson, B., Tönjes, A., Tuomi, T., van Meurs, J. B. J., van Ommen, G.-J., Vatin, V., Viikari, J., Visvikis-Siest, S., Vitart, V., Vogel, C. I. G., Voight, B. F., Waite, L. L., Wallaschofski, H., Walters, G. B., Widen, E., Wiegand, S., Wild, S. H., Willemssen, G., Witte, D. R., Wittteman, J. C., Xu, J., Zhang, Q., Zgaga, L., Ziegler, A., Zitting, P., Beilby, J. P., Farooqi, I. S., Hebebrand, J., Huikuri, H. V., James, A. L., Kähönen, M., Levinson, D. F., Macciardi, F., Nieminen, M. S., Ohlsson, C., Palmer, L. J., Ridker, P. M., Stumvoll, M., Beckmann, J. S., Boeing, H., Boerwinkle, E., Boomsma, D. I., Caulfield, M. J., Chanock, S. J., Collins, F. S., Cupples, L. A., Smith, G. D., Erdmann, J., Froguel, P., Grönberg, H., Gyllensten, U., Hall, P., Hansen, T., Harris, T. B., Hattersley, A. T., Hayes, R. B., Heinrich, J., Hu, F. B., Hveem, K., Illig, T., Jarvelin, M.-R., Kaprio, J., Karpe, F., Khaw, K.-T., Kiemeny, L. A., Krude, H., Laakso, M., Lawlor, D. A., Metspalu, A., Munroe, P. B., Ouwehand, W. H., Pedersen, O., Penninx, B. W., Peters, A., Pramstaller, P. P., Quertermous, T., Reinehr, T., Rissanen, A., Rudan, I., Samani, N. J., Schwarz, P. E. H., Shuldiner, A. R., Spector, T. D., Tuomilehto, J., Uda, M., Uitterlinden, A., Valle, T. T., Wabitsch, M., Waeber, G., Wareham, N. J., Watkins, H., on behalf of Procardis Consortium, Wilson, J. F., Wright, A. F., Zillikens, M. C., Chatterjee, N., McCarroll, S. A., Purcell, S., Schadt, E. E., Visscher, P. M., Assimes, T. L., Borecki, I. B., Deloukas, P., Fox, C. S., Groop, L. C., Haritunians, T., Hunter, D. J., Kaplan, R. C., Mohlke, K. L., O'Connell, J. R., Peltonen, L., Schlessinger, D., Strachan, D. P., van Duijn, C. M., Wichmann, H.-E., Frayling, T. M., Thorsteinsdottir, U., Abecasis, G. R., Barroso, I., Boehnke, M., Stefansson, K., North, K. E., McCarthy, M. I., Hirschhorn, J. N., Ingelsson, E., and Loos, R. J. F. (2010) Association analyses of 249,796 individuals reveal 18 new loci associated with body mass index. *Nature Genetics*. **42**, 937–948
82. Ng, E., Lind, P. M., Lindgren, C., Ingelsson, E., Mahajan, A., Morris, A., and Lind, L. (2015) Genome-wide association study of toxic metals and trace elements reveals novel associations. *Hum Mol Genet*. **24**, 4739–4745
83. Waterworth Dawn M., Ricketts Sally L., Song Kijoung, Chen Li, Zhao Jing Hua, Ripatti Samuli, Aulchenko Yuri S., Zhang Weihua, Yuan Xin, Lim Noha, Luan Jian'an, Ashford Sofie, Wheeler Eleanor, Young Elizabeth H., Hadley David, Thompson John R., Braund Peter S., Johnson Toby, Struchalin Maksim, Surakka Ida, Luben Robert, Khaw Kay-Tee, Rodwell Sheila A., Loos Ruth J.F., Boekholdt S. Matthijs, Inouye Michael, Deloukas Panagiotis, Elliott Paul, Schlessinger David, Sanna Serena, Scuteri Angelo, Jackson Anne, Mohlke Karen L., Tuomilehto Jaako, Roberts Robert, Stewart Alexandre, Kesäniemi Y. Antero, Mahley Robert W., Grundy Scott M., null null, McArdle Wendy, Cardon Lon, Waeber Gérard, Vollenweider Peter, Chambers John C., Boehnke Michael, Abecasis Gonçalo R., Salomaa Veikko, Jarvelin Marjo-Riitta, Ruukonen Aimo, Barroso Inês, Epstein Stephen E., Hakonarson Hakon H., Rader Daniel J., Reilly Muredach P., Wittteman Jacqueline C.M., Hall Alistair S., Samani Nilesh J., Strachan David P., Barter Philip, van Duijn Cornelia M., Kooner Jaspal S., Peltonen Leena, Wareham Nicholas J., McPherson Ruth, Mooser Vincent, and Sandhu Manjinder S. (2010) Genetic Variants Influencing Circulating Lipid Levels and Risk of Coronary Artery Disease. *Arteriosclerosis, Thrombosis, and Vascular Biology*. **30**, 2264–2276
84. Rubenstein, A. H., Levin, N. W., and Elliott, G. A. (1962) Manganese-Induced Hypoglycemia. *The Lancet*
85. Kessissoglou, D. P. (1995) Manganese-Proteins and -Enzymes and Relevant Trinuclear Synthetic Complexes. in *Bioinorganic Chemistry* (Kessissoglou, D. P. ed), pp. 299–320, Springer Netherlands, Dordrecht, 10.1007/978-94-011-0255-1\_23



86. Kanyo, Z. F., Scolnick, L. R., Ash, D. E., and Christianson, D. W. (1996) Structure of a unique binuclear manganese cluster in arginase. *Nature*. **383**, 554–557
87. K vamees, O., Shemyakin, A., and Pernow, J. (2016) Amino acid metabolism reflecting arginase activity is increased in patients with type 2 diabetes and associated with endothelial dysfunction. *Diabetes and Vascular Disease Research*. **13**, 354–360
88. Atawia, R. T., Bunch, K. L., Toque, H. A., Caldwell, R. B., and Caldwell, R. W. (2019) Mechanisms of obesity-induced metabolic and vascular dysfunctions. *Front Biosci (Landmark Ed)*. **24**, 890–934
89. Bond, J. S., Failla, M. L., and Unger, D. F. (1983) Elevated manganese concentration and arginase activity in livers of streptozotocin-induced diabetic rats. *J. Biol. Chem.* **258**, 8004–8009
90. Cappel, D. A., Deja, S., Duarte, J. A. G., Kucejova, B., I nigo, M., Fletcher, J. A., Fu, X., Berglund, E. D., Liu, T., Elmquist, J. K., Hammer, S., Mishra, P., Browning, J. D., and Burgess, S. C. (2019) Pyruvate-Carboxylase-Mediated Anaplerosis Promotes Antioxidant Capacity by Sustaining TCA Cycle and Redox Metabolism in Liver. *Cell Metabolism*. **29**, 1291-1305.e8
91. Lao-On, U., Attwood, P. V., and Jitrapakdee, S. (2018) Roles of pyruvate carboxylase in human diseases: from diabetes to cancers and infection. *J Mol Med*. **96**, 237–247
92. Baly, D. L., Keen, C. L., and Hurley, L. S. (1986) Effects of manganese deficiency on pyruvate carboxylase and phosphoenolpyruvate carboxykinase activity and carbohydrate homeostasis in adult rats. *Biological Trace Element Research*. **11**, 201–212
93. Hurley, L. S., Keen, C. L., and Baly, D. L. (1984) Manganese deficiency and toxicity: effects on carbohydrate metabolism in the rat. *Neurotoxicology*. **5**, 97–104
94. Jattan, J., Rodia, C., Li, D., Diakhate, A., Dong, H., Bataille, A., Shroyer, N. F., and Kohan, A. B. (2017) Using primary murine intestinal enteroids to study dietary TAG absorption, lipoprotein synthesis, and the role of apoC-III in the intestine. *J. Lipid Res*. **58**, 853–865
95. Ishizawa, M., Akagi, D., and Makishima, M. (2018) Lithocholic Acid Is a Vitamin D Receptor Ligand That Acts Preferentially in the Ileum. *International Journal of Molecular Sciences*. **19**, 1975

## FOOTNOTES

The content is solely the responsibility of the authors and does not necessarily represent the official views of the National Institutes of Health

**Table 1. Composition of BA pools**

| BA group  | BA species                                 | mol % in H10 | mol % in H90 | mol % in M10 | mol % in M90 |
|-----------|--------------------------------------------|--------------|--------------|--------------|--------------|
| 12HBA     | Cholic acid (CA)                           | 7            | 63           | 9.0          | 81.0         |
| 12HBA     | Deoxycholic acid (DCA)                     | 3            | 27           | 1.0          | 9.0          |
| Non-12HBA | Chenodeoxycholic acid (CDCA)               | 86.85        | 9.65         | 13.5         | 1.5          |
| Non-12HBA | Ursodeoxycholic acid (UDCA)                | 2.25         | 0.25         | 8.1          | 0.9          |
| Non-12HBA | Lithocholic acid (LCA)                     | 0.90         | 0.10         | 0.9          | 0.1          |
| Non-12HBA | $\alpha$ -Muricholic acid ( $\alpha$ -MCA) |              |              | 22.5         | 2.5          |
| Non-12HBA | $\beta$ -Muricholic acid ( $\beta$ -MCA)   |              |              | 45.0         | 5.0          |

BAs were in their glycine-conjugated forms for human BA pools and taurine-conjugated forms for mouse BA pools, except LCA, which was unconjugated.



**Table 2. Pathway analysis of 516 genes induced by both human low 12HBA and mouse low 12HBA pools**

| GO term    | Description                         | Count | %    | PValue   | Genes                                                                                                                                                                                                                                                                                                      | List Total | Pop Hits | Pop Total | Fold Enrichment | FDR      |
|------------|-------------------------------------|-------|------|----------|------------------------------------------------------------------------------------------------------------------------------------------------------------------------------------------------------------------------------------------------------------------------------------------------------------|------------|----------|-----------|-----------------|----------|
| GO:0006629 | lipid metabolic process             | 39    | 7.88 | 1.60E-11 | HSD17B11, ACOX1, CHKA, PTGS2, ALOXE3, CHKB, EHHADH, ABHD3, ASAH2, APOB, INSIG2, APOBR, ACOT12, ETNK1, MGLL, PLCD1, HSD17B4, PLCB1, ACAA1B, ACSL5, SCD1, SOAT2, MOGAT2, CUBN, NCEH1, LIPA, PLB1, EPHX2, ACACB, LPIN2, LPCAT3, LPCAT4, GDDP2, MTTP, PCX, CLPS, HMGS2, LIPH, VLDLR                            | 425        | 459      | 18082     | 3.61500961      | 2.70E-08 |
| GO:0016491 | oxidoreductase activity             | 40    | 8.08 | 1.57E-08 | HSD17B11, ME1, ACOX1, CYP24A1, ALDH1L1, CYP3A25, PTGS2, ALOXE3, EHHADH, OSGIN1, ALDH1L2, ALDH3A2, MTHFD2, FMOS, ADH1, ALDH1A3, ADH4, GPX3, ALDH1A7, SMOX, HSD17B4, NOS2, QSOX1, CYP3A44, ADH6A, SCD1, SUOX, CYP3A13, CYP3A11, DHRS9, POR, AKR1B8, CYP4A10, DHRS1, AKR1B7, RDH10, HSDL2, TPH1, BCO2, RETSAT | 415        | 604      | 17446     | 2.78401021      | 2.34E-05 |
| GO:0052689 | carboxylic ester hydrolase activity | 13    | 2.63 | 4.39E-07 | NCEH1, ACOT2, ABHD3, ACOT1, ACOT5, ACOT4, ACOT3, ACOT12, CES2A, CES1G, MGLL, LIPH, CES2B                                                                                                                                                                                                                   | 415        | 81       | 17446     | 6.74692845      | 6.56E-04 |

Table 2 (continued)

| GO term    | Description                                  | Count | %    | PValue   | Genes                                                                                                                                                                                                                                                                                       | List Total | Pop Hits | Pop Total | Fold Enrichment | FDR        |
|------------|----------------------------------------------|-------|------|----------|---------------------------------------------------------------------------------------------------------------------------------------------------------------------------------------------------------------------------------------------------------------------------------------------|------------|----------|-----------|-----------------|------------|
| GO:0055114 | oxidation-reduction process                  | 38    | 7.68 | 1.66E-06 | HSD17B11, ME1, ACOX1, CYP24A1, ALDH1L1, CYP3A25, PTGS2, ALOXE3, EHHADH, ALDH1L2, ALDH3A2, MTHFD2, FMO5, ADH1, ALDH1A3, ADH4, GPX3, ALDH1A7, SMOX, HSD17B4, NOS2, QSOX1, CYP3A44, SCD1, SUOX, CYP3A13, CYP3A11, DHRS9, POR, AKR1B8, DHRS1, CYP4A10, AKR1B7, RDH10, HSDL2, TPH1, BCO2, RETSAT | 425        | 676      | 18082     | 2.39163244      | 0.00281558 |
| GO:0005102 | receptor binding                             | 27    | 5.45 | 6.36E-06 | PVR, ACOX1, FGF15, EHHADH, ACOT2, ACOT4, SCT, ANG, GSTK1, CCDC129, NOS2, HSD17B4, FGF3, MATK, H2-Q2, PLAT, ICOSL, H2-Q1, BTNL2, EPHX2, CD160, PLAUR, LAMA3, GM8909, LAMA5, H2-BL, VEGFA                                                                                                     | 415        | 412      | 17446     | 2.7549538       | 0.00950826 |
| GO:0047617 | acyl-CoA hydrolase activity                  | 6     | 1.21 | 8.08E-06 | ACOT12, ACOT2, ACOT1, ACOT5, ACOT4, ACOT3                                                                                                                                                                                                                                                   | 415        | 13       | 17446     | 19.4024096      | 0.01207519 |
| GO:0006631 | fatty acid metabolic process                 | 15    | 3.03 | 1.89E-05 | SCD1, ACOX1, LIPA, PTGS2, ALOXE3, EHHADH, ACACB, LPIN2, CYP4A10, ACOT12, MGLL, FABP2, HSD17B4, ACAA1B, ACSL5                                                                                                                                                                                | 425        | 156      | 18082     | 4.09095023      | 0.03207602 |
| GO:0000038 | very long-chain fatty acid metabolic process | 6     | 1.21 | 2.44E-05 | ACOX1, ACOT2, HSD17B4, ACOT5, ACOT4, ACOT3                                                                                                                                                                                                                                                  | 425        | 16       | 18082     | 15.9547059      | 0.04137758 |

**Abbreviations**

12-HBA, 12 $\alpha$ -hydroxylated bile acid;  $\alpha$ -MCA,  $\alpha$ -muricholic acid;  $\beta$ -MCA,  $\beta$ -muricholic acid; BA(s), bile acid(s); CA, cholic acid; CDCA, chenodeoxycholic acid; DCA, deoxycholic acid; FXR, farnesoid X receptor; LCA, lithocholic acid; UDCA, ursodeoxycholic acid; VDR, vitamin D receptor

FIGURES

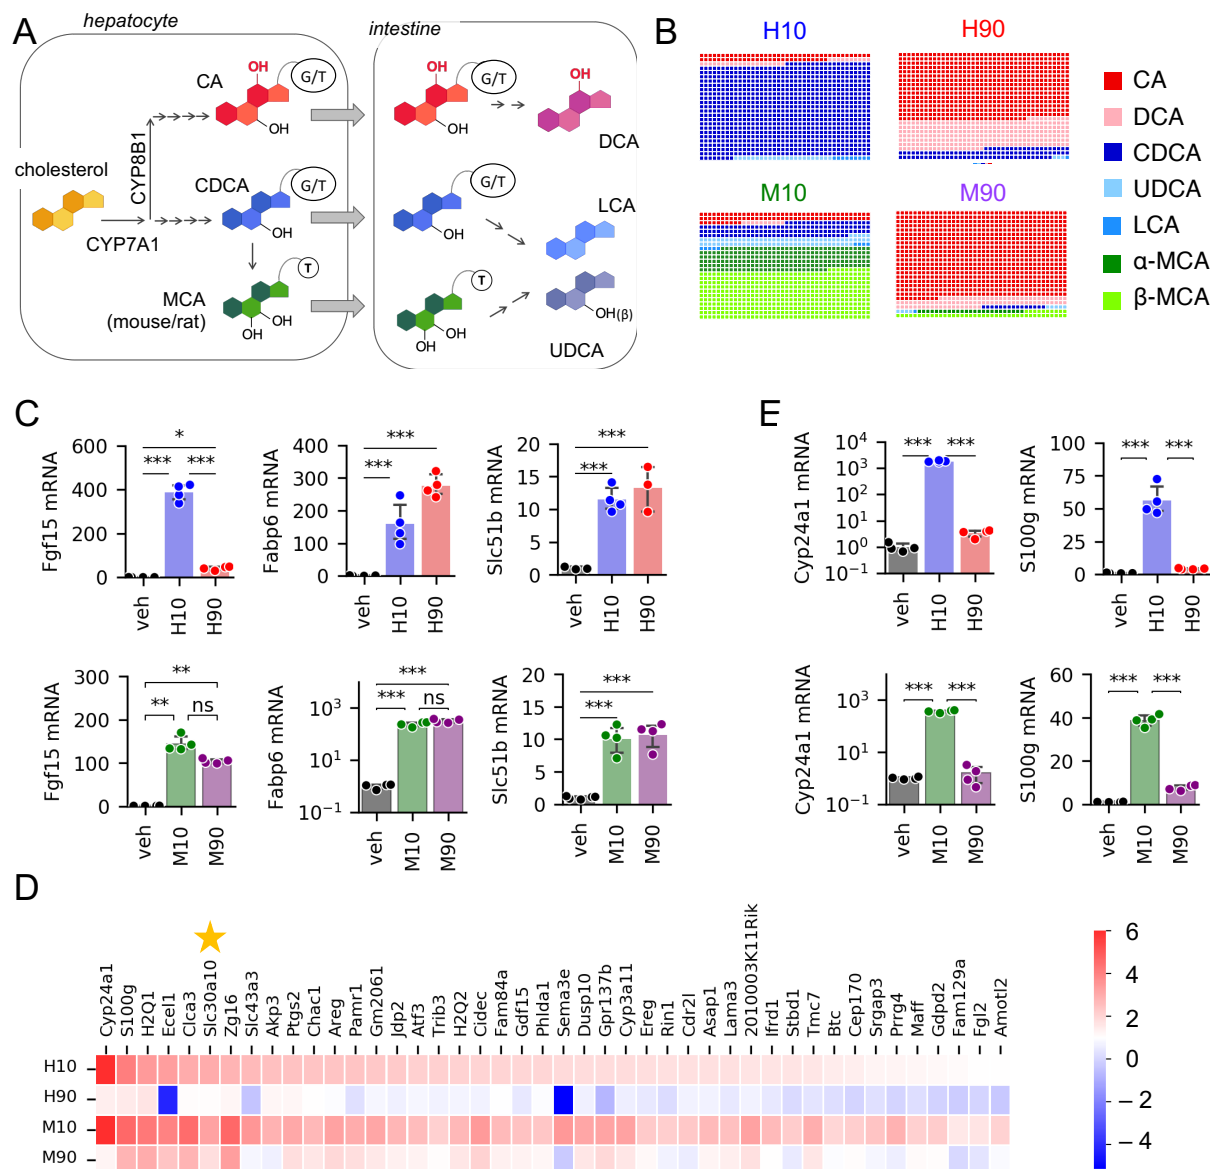

**Figure 1. Differential regulation of gene expression by BA pool composition.** (A) Simplified BA synthesis pathway. (B) Composition of BA pools used in this study. Glycine-conjugated BAs were used in human pools, while taurine-conjugated BAs were used in mouse pools, except LCA, which was unconjugated. (C) Expression of FXR target genes measured by qPCR. n=3-4 wells of organoids per condition. (D) Genes preferentially induced by H10 and M10 compared to H90 and M90 identified by RNAseq (log<sub>2</sub> fold-change > 1 and  $p_{adj} < 0.05$ ). n=3 per condition. (E) Expression of VDR target genes measured by qPCR. n=3-4 wells per condition. \* $p < 0.05$ , \*\* $p < 0.01$ , and \*\*\* $p < 0.001$ .

*Bile acids regulate manganese transport*

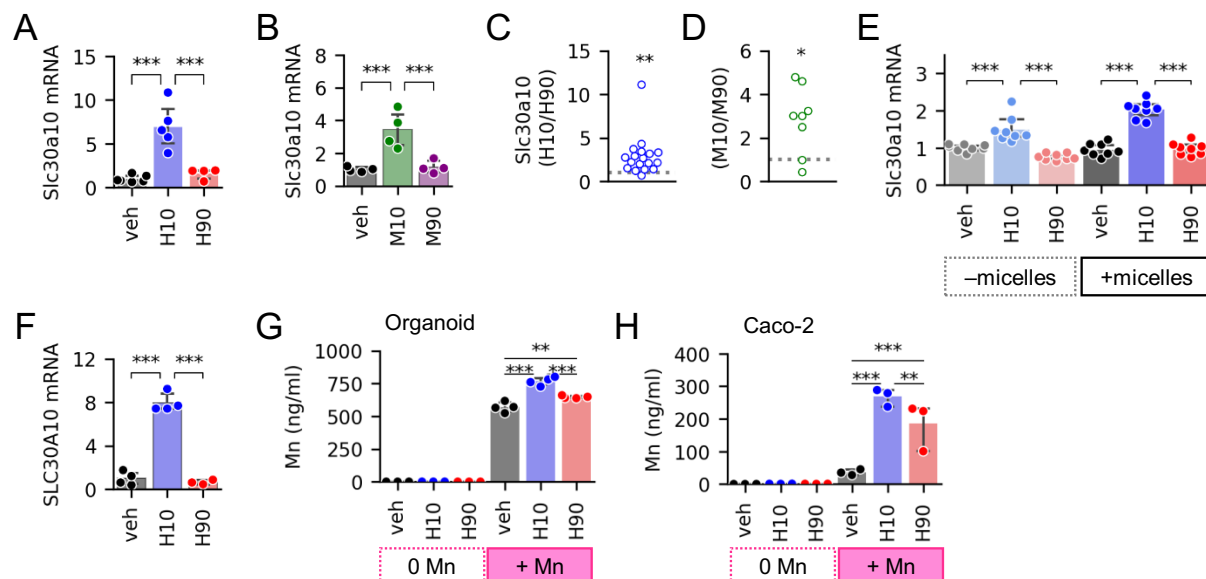

**Figure 2. Low 12HBA pools regulate *Slc30a10* expression and Mn efflux.** *Slc30a10* mRNA levels in gut organoids treated with (A) human BA pools, (B) mouse BA pools. n=4-6 wells of organoids per condition. (C, D) Aggregate fold-change differences in *Slc30a10* induction across different batches of organoids. Each point represents the data derived from a different mouse (n=8-18). The data point plotted is the ratio of (average mRNA levels in low 12HBA-treated organoids [n=3-8 wells])/(average mRNA levels in high 12HBA-treated organoids [n=3-8 wells]). Ratios >1 signify higher expression in low 12HBA-treated group, ratios <1 signify higher expression in high 12HBA-treated group, ratios = 1 signify no difference between low- versus high- 12HBA-treated groups. The gray dotted line marks ratio = 1. \*p<0.05, \*\*p<0.01 one-sample t-test with  $\mu=1$  (expected ratio for no preferential induction). (E) *Slc30a10* mRNA levels in ileal organoids treated with human BA pools delivered without or with micelles. n=8 wells per condition. (F) *SLC30A10* mRNA levels in Caco-2 treated with human BA pools. n=3-4 wells of cells per condition. (G-H) Mn concentrations in efflux media of (G) organoids and (H) Caco-2 cells, n=3-4 wells per condition. \*p<0.05, \*\*p<0.01, and \*\*\*p<0.001.



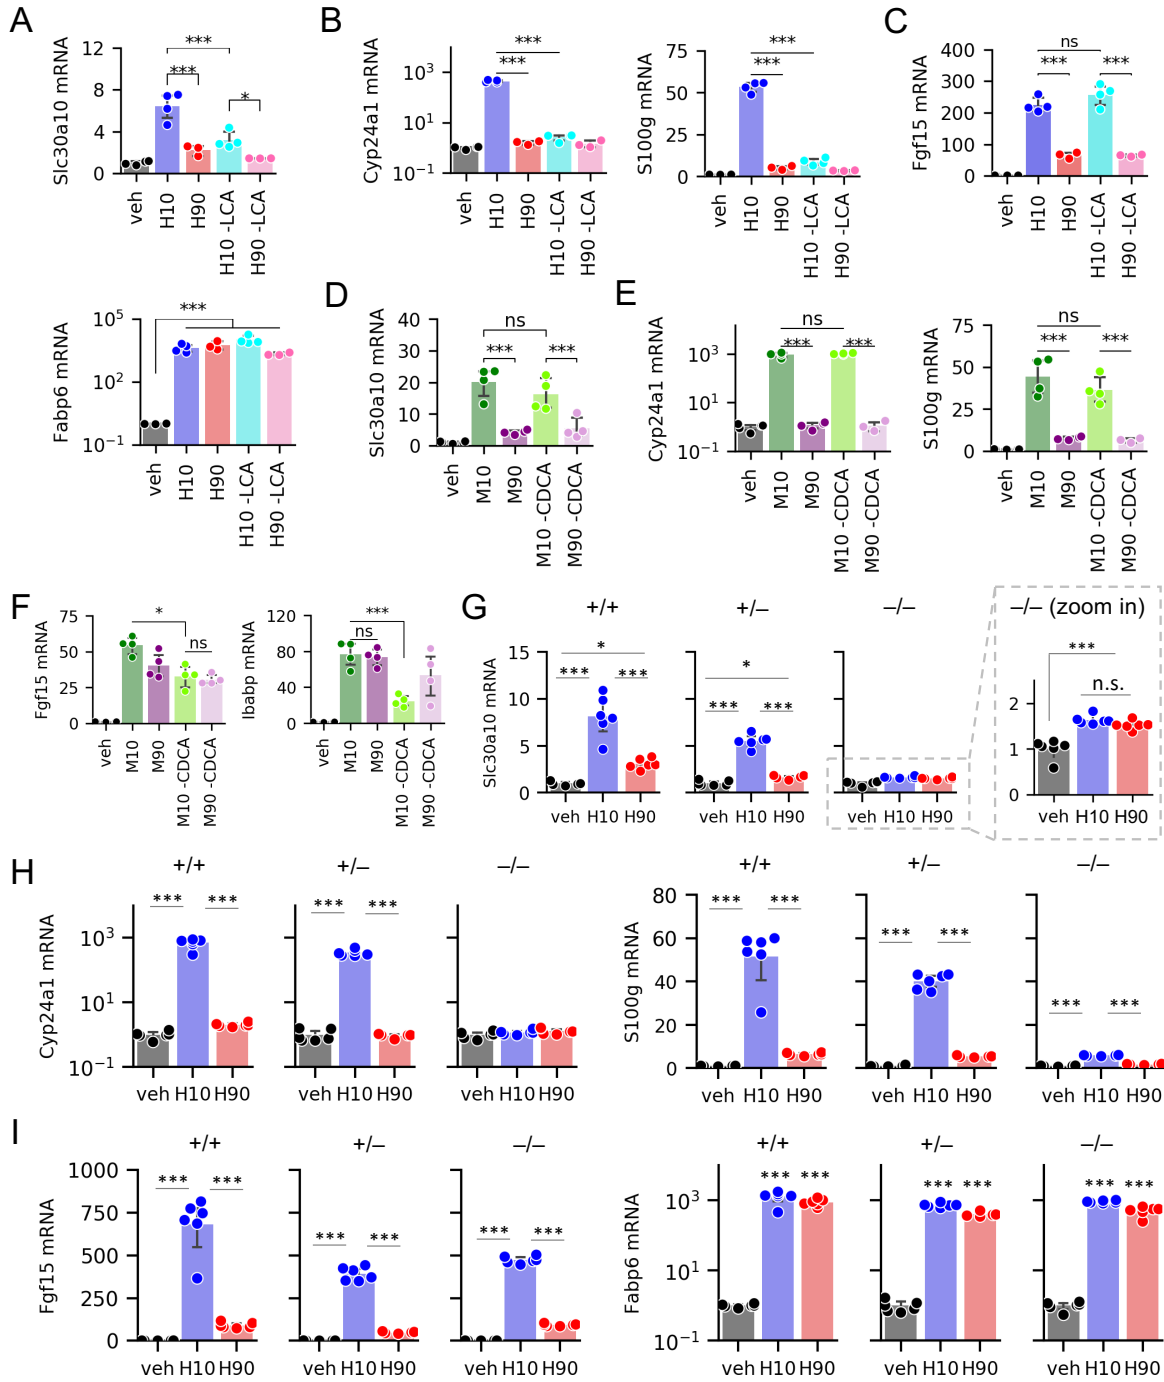

**Figure 3. *Slc30a10* expression is regulated by LCA–VDR signaling.** (A–E) mRNA levels of *Slc30a10*, VDR targets, and FXR targets in wild-type ileal organoids after treatment with (A–C) human BA pools containing or lacking LCA or (D–F) mouse BA pools containing or lacking CDCA. N=3–4 wells of organoids per condition. (G–I) Expression of *Slc30a10*, VDR targets, and FXR targets in organoids derived from *Vdr*<sup>+/+</sup>, *Vdr*<sup>+/-</sup>, and *Vdr*<sup>-/-</sup> littermates after exposure to vehicle or human BA pools. n=6 wells of organoids per condition. \**p*<0.05 and \*\*\**p*<0.001.

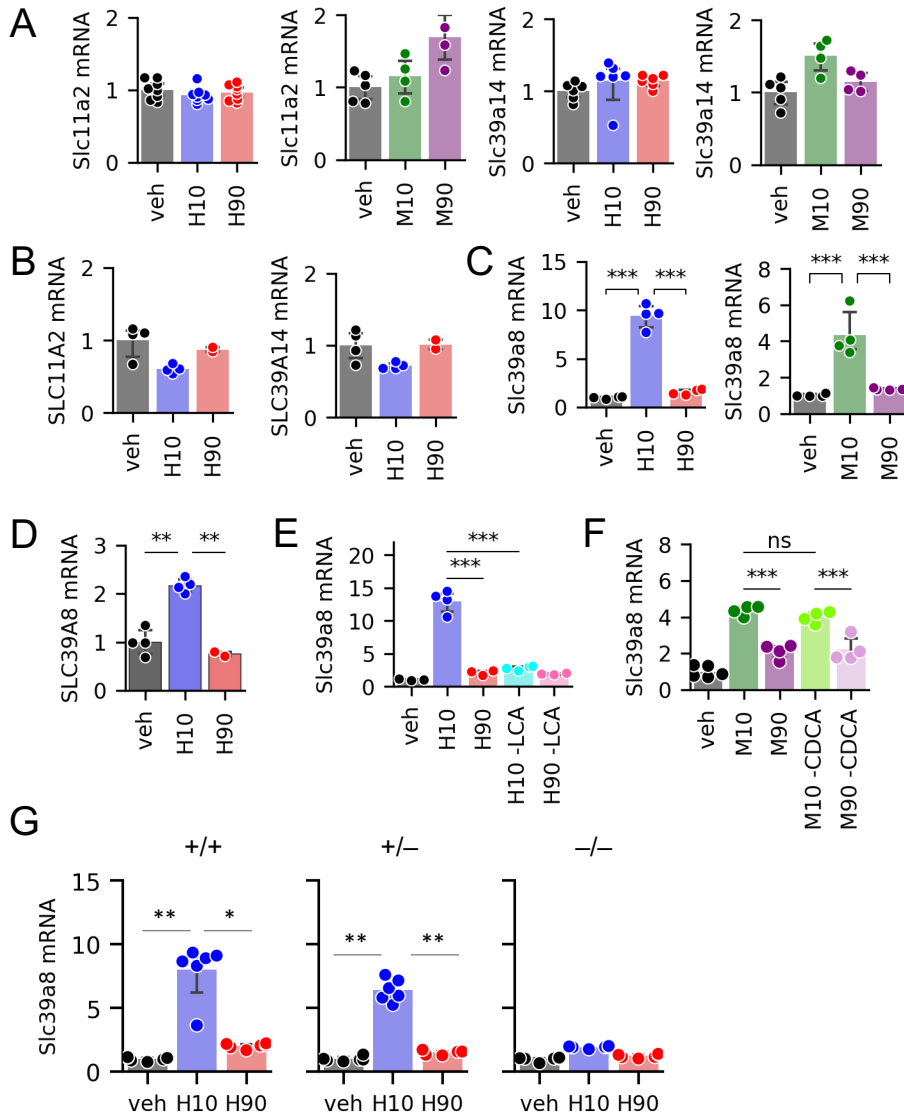

**Figure 4. BA effects on additional Mn transporters.** Expression of (A) *Slc11a2* and *Slc39a14*, (C) *Slc39a8* in organoids, and (B, D) their corresponding human genes in Caco-2 cells (n=4-8 wells of cells or organoids per group). (E-F) *Slc39a8* expression in organoids exposed to (E) human BA pools with or without LCA and (F) mouse BA pools with or without CDCA (n=4 wells of organoids per group). (G) *Slc39a8* expression in organoids generated from *Vdr*<sup>+/+</sup>, *Vdr*<sup>+/-</sup>, and *Vdr*<sup>-/-</sup> littermates after exposure to human BA pools (n=6 wells of organoids per group). \**p*<0.05, \*\**p*<0.01, and \*\*\**p*<0.001.

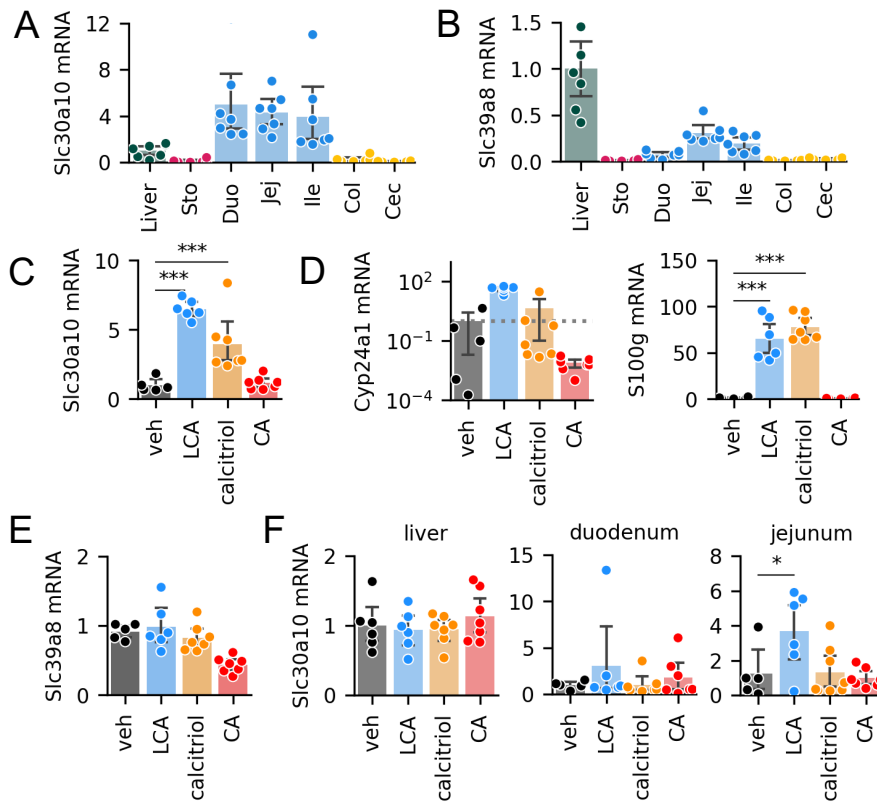

**Figure 5. VDR activation increases *Slc30a10* transcription *in vivo*.** Expression of (A) *Slc30a10* and (B) *Slc39a8* in liver and gastrointestinal tissues in C57BL/6 mice (n=7). Liver was used as reference tissue. Ileal expression of (C) *Slc30a10*, (D) VDR targets *Cyp24a1* and *S100g*, and (E) *Slc39a8* after oral gavage with corn oil supplemented with vehicle, LCA, calcitriol, or CA. n=5–7 mice per group. (F) *Slc30a10* expression in liver, duodenum, and jejunum after gavage experiment. \* $p < 0.05$ , \*\* $p < 0.01$ , and \*\*\* $p < 0.001$ .
